# Supplementary material
Source: Research Square preprint supplement (doi:10.21203/rs.3.rs-9437706/v1)
Supplement: Supplementary file 1 [file 1723d6db0b906529811d122c.xlsx]

## Sheet: Sheet1
Supporting Table 9. Definition of Chronic kidney disease.
	Codes
ICD-9	585 Chronic renal failure，5859 Chronic renal failure
ICD-10	N18.0 End-stage renal disease,N18.1 Chronic kidney disease, stage 1,N18.2 Chronic kidney disease, stage 2,N18.3 Chronic kidney disease, stage 3,N18.4 Chronic kidney disease, stage 4,N18.5 Chronic kidney disease, stage 5, N18.8 Other chronic renal failure，N18.9 Chronic renal failure, unspecified N19 Unspecified renal failure N12 Tubulo-interstitial nephritis, not specified as acute or chronic N13.…
Self report	1192 renal/kidney failure,1193 renal failure requiring dialysis,1194 renal failure not requiring dialysis
Others	30700 Serum Creatinine
