# Supplementary material
Source: Research Square preprint supplement (doi:10.21203/rs.3.rs-9437706/v1)
Supplement: Supplementary file 1 [file 3687ef6db0b6d8bca1566949.docx]

**Supporting Table 8. Causal Mediation Analysis of the Proteomic Risk Score in the Association Between Allostatic load and Chronic kidney disease**

| Effect Component | Estimate | 95% CI | P Value |
| --- | --- | --- | --- |
| Effect Decomposition |  |  |  |
| Total Effect (TE) | 1.27 | 1.20 – 1.34 | < 0.001 |
| Natural Direct Effect (NDE) | 1.09 | 1.02 – 1.15 | 0.014 |
| Natural Indirect Effect (NIE) | 1.17 | 1.15 – 1.19 | < 0.001 |
| Proportion Mediated |  |  |  |
| PM | 67.70% | 56.2% – 89.0% | < 0.001 |
| Abbreviations:TE, total effect; NDE, natural direct effect; NIE, natural indirect effect; PM, proportion mediated; HR, hazard ratio; CI, confidence interval. | | | |
