# Supplementary material
Source: Research Square preprint supplement (doi:10.21203/rs.3.rs-9437706/v1)
Supplement: Supplementary file 2 [file 4a2b4428b32f69d2d873a19b.docx]

**Supporting Table 6. Quantitative Features of Proteomic Trajectories in the Pre-diagnostic Period**

(Z-score trajectories of plasma proteins across trajectory clusters during the 15 years preceding pancreatic cancer diagnosis.)

| **Protein** | **Trajectory Cluster** | **Z-Score at Baseline** | **Z-Score at Diagnosis** | **Overall Change**  **(ΔZ)** | **Peak Z-Score** | **Nadir Z-Score** | **Time of Peak**  **(Years to Dx)** | **Trajectory Pattern** |
| --- | --- | --- | --- | --- | --- | --- | --- | --- |
| Cluster 1 — Stable or Fluctuating |  |  |  |  |  |  |  |  |
| FSTL3 | 1 | -0.2 | 0.29 | +0.49 | 0.29 | -0.2 | 0 | Stable / Fluctuating |
| EDA2R | 1 | -0.15 | 0.31 | +0.46 | 0.31 | -0.15 | 0 | Stable / Fluctuating |
| SCARB2 | 1 | -0.21 | 0.18 | +0.39 | 0.22 | -0.21 | 2.58 | Stable / Fluctuating |
| RNASE1 | 1 | -0.1 | 0.26 | +0.35 | 0.26 | -0.11 | 0 | Stable / Fluctuating |
| YAP1 | 1 | -0.12 | 0.24 | +0.35 | 0.24 | -0.12 | 0 | Stable / Fluctuating |
| HAVCR1 | 1 | -0.02 | 0.32 | +0.34 | 0.32 | -0.13 | 0 | Stable / Fluctuating |
| Cluster 2 — Late Sharp Increase |  |  |  |  |  |  |  |  |
| WFDC2 | 2 | -0.42 | 0.58 | +1.00 | 0.58 | -0.42 | 0 | Late Sharp Increase |
| IGFBP4 | 2 | -0.3 | 0.52 | +0.82 | 0.52 | -0.3 | 0 | Late Sharp Increase |
| GDF15 | 2 | -0.26 | 0.46 | +0.72 | 0.46 | -0.26 | 0 | Late Sharp Increase |
| Cluster 3 — Late Sharp Increase |  |  |  |  |  |  |  |  |
| SHISA5 | 3 | -0.22 | 0.7 | +0.92 | 0.7 | -0.22 | 0 | Late Sharp Increase |
| Abbreviations:Dx, diagnosis; ΔZ, change in Z-score; FSTL3, Follistatin-like 3; EDA2R, Ectodysplasin A2 Receptor; SCARB2, Scavenger Receptor Class B Member 2; RNASE1, Ribonuclease A Family Member 1; YAP1, Yes-associated Protein 1; HAVCR1, Hepatitis A Virus Cellular Receptor 1; WFDC2, WAP Four-Disulfide Core Domain 2 (HE4); IGFBP4, Insulin-like Growth Factor Binding Protein 4; GDF15, Growth Differentiation Factor 15; SHISA5, Shisa Family Member 5. | | | | | | | | |
