# Supplementary material
Source: Research Square preprint supplement (doi:10.21203/rs.3.rs-9437706/v1)
Supplement: Supplementary file 3 [file debdafa2e63d7d50a3a7e8bc.docx]

**Supporting Table 7. Clustering Robustness Validation and Timing of First Proteomic Abnormality**

(Comparison of trajectory cluster assignments by hierarchical clustering and K-means clustering, with the estimated time of first abnormal Z-score deviation and fluctuation status for each protein)

| **Protein** | **Hierarchical Cluster** | **K-Means Cluster** | **First Abnormality**  **(Years Before Dx)** | **Transient Fluctuation** | **Abnormality Persistence** |
| --- | --- | --- | --- | --- | --- |
| Cluster 1 — Stable / Fluctuating (n = 6 proteins) |  |  |  |  |  |
| SCARB2 | 1 | 1 | 4.55 | Yes | Transient reversion |
| EDA2R | 1 | 1 | 3.94 | No | Sustained |
| FSTL3 | 1 | 1 | 3.48 | No | Sustained |
| HAVCR1 | 1 | 1 | 3.03 | No | Sustained |
| RNASE1 | 1 | 1 | 2.27 | No | Sustained |
| YAP1 | 1 | 1 | 2.12 | No | Sustained |
| Cluster 2 — Late Sharp Increase (n = 3 proteins) |  |  |  |  |  |
| GDF15 | 2 | 3 | 4.7 | No | Sustained |
| WFDC2 | 2 | 3 | 4.24 | No | Sustained |
| IGFBP4 | 2 | 3 | 4.09 | No | Sustained |
| Cluster 3 — Late Sharp Increase (n = 1 protein) |  |  |  |  |  |
| SHISA5 | 3 | 2 | 4.39 | No | Sustained |
| Abbreviations:Dx, diagnosis; SCARB2, Scavenger Receptor Class B Member 2; EDA2R, Ectodysplasin A2 Receptor; FSTL3, Follistatin-like 3; HAVCR1, Hepatitis A Virus Cellular Receptor 1; RNASE1, Ribonuclease A Family Member 1; YAP1, Yes-associated Protein 1; GDF15, Growth Differentiation Factor 15; WFDC2, WAP Four-Disulfide Core Domain 2 (HE4); IGFBP4, Insulin-like Growth Factor Binding Protein 4; SHISA5, Shisa Family Member 5. | | | | | |
