# Supplementary material
Source: Research Square preprint supplement (doi:10.21203/rs.3.rs-9437706/v1)
Supplement: Supplementary file 4 [file 912608dede800ca6fe2f54c9.xlsx]

## Sheet: Sheet1
Supporting Table 4: Fine-Gray competing risk models for the incidence of CKD, accounting for all-cause mortality as a competing risk.
Allostatic load	Events	Total/Person years	Model 1		Model 2		Model 3
			HR(95%CI)	P value	HR(95%CI)	P value	HR(95%CI)	P value
Per SD increment	15446	368806/4844640.6	1.79 (1.77-1.82)	<0.001	1.65 (1.63-1.68)	<0.001	1.26 (1.23-1.28)	<0.001
Q1	1422	92202/1231074.7	Ref		Ref		Ref
Q2	2507	92202/1219725.1	1.62 (1.52-1.73)	<0.001	1.50 (1.41-1.60)	<0.001	1.32 (1.23-1.41)	<0.001
Q3	4112	92201/1207556.4	2.71 (2.55-2.87)	<0.001	2.35 (2.21-2.50)	<0.001	1.52 (1.43-1.62)	<0.001
Q4	7405	92201/1186284.3	5.20 (4.91-5.50)	<0.001	4.07 (3.84-4.32)	<0.001	1.97 (1.85-2.10)	<0.001
Model 1: Adjusted for age, gender, ethnicity. Model 2: Adjused for model 1 plus TDI, education, BMI, smoking status, drinking status. Model 3: Adjused for model 2 plus eGFR, CVD , PRS. Abbrevation:BMI, body mass index; eGFR, estimated glomerular filtration rate; CVD:Cardiovascular disease; TDI:Townsend deprivation index; CKD:Chronic kidney disease; PRS:polygenic risk score; HR:Hazard Ratio; CI: c…
