# Supplementary material
Source: Research Square preprint supplement (doi:10.21203/rs.3.rs-9437706/v1)
Supplement: Supplementary file 4 [file f91ca0aad7ebd15f5d5865d1.docx]

**Supporting Table 1. Baseline Characteristics of Study Participants in the Training and Test Sets**

| **Characteristics** | **Overall**  **(N = 39,343)** | **Training set**  **(n = 27,541)** | **Test set**  **(n = 11,802)** | ***P* value** |
| --- | --- | --- | --- | --- |
| **Age, years, mean (SD)** | 56.58 (8.20) | 56.59 (8.21) | 56.55 (8.18) | 0.628 |
| **Sex, n (%)** |  |  |  | 0.723 |
| Female | 21,093 (53.6) | 14,749 (53.6) | 6,344 (53.8) |  |
| Male | 18,250 (46.4) | 12,792 (46.4) | 5,458 (46.2) |  |
| **Ethnicity, n (%)** |  |  |  | 0.759 |
| White | 36,892 (93.8) | 25,818 (93.7) | 11,074 (93.8) |  |
| Non-White | 2,451 (6.2) | 1,723 (6.3) | 728 (6.2) |  |
| **TDI, median [IQR]** | −2.08 [−3.63, 0.70] | −2.09 [−3.63, 0.70] | −2.07 [−3.62, 0.71] | 0.608 |
| **Education level, n (%)** |  |  |  | 0.404 |
| College or university degree | 12,642 (32.1) | 8,838 (32.1) | 3,804 (32.2) |  |
| Other levels | 19,496 (49.6) | 13,700 (49.7) | 5,796 (49.1) |  |
| Unknown | 7,205 (18.3) | 5,003 (18.2) | 2,202 (18.7) |  |
| **BMI category, n (%)** |  |  |  | 0.519 |
| Underweight (<18.5 kg/m²) | 206 (0.5) | 136 (0.5) | 70 (0.6) |  |
| Normal (18.5–24.9 kg/m²) | 12,812 (32.6) | 9,007 (32.7) | 3,805 (32.2) |  |
| Overweight (25.0–29.9 kg/m²) | 16,868 (42.9) | 11,789 (42.8) | 5,079 (43.0) |  |
| Obese (≥30.0 kg/m²) | 9,457 (24.0) | 6,609 (24.0) | 2,848 (24.1) |  |
| **Smoking status, n (%)** |  |  |  | 0.608 |
| Never | 21,426 (54.5) | 15,021 (54.5) | 6,405 (54.3) |  |
| Previous | 13,673 (34.7) | 9,577 (34.8) | 4,096 (34.7) |  |
| Current | 4,244 (10.8) | 2,943 (10.7) | 1,301 (11.0) |  |
| **Alcohol consumption, n (%)** |  |  |  | 0.215 |
| Never | 1,805 (4.6) | 1,263 (4.6) | 542 (4.6) |  |
| Previous | 1,495 (3.8) | 1,077 (3.9) | 418 (3.5) |  |
| Current | 36,043 (91.6) | 25,201 (91.5) | 10,842 (91.9) |  |
| **eGFR, mL/min/1.73 m², mean (SD)** | 91.50 (11.97) | 91.47 (11.90) | 91.55 (12.14) | 0.507 |
| **History of CVD, n (%)** |  |  |  | 0.068 |
| No | 37,005 (94.1) | 25,944 (94.2) | 11,061 (93.7) |  |
| Yes | 2,338 (5.9) | 1,597 (5.8) | 741 (6.3) |  |
| **PRS for CKD, mean (SD)** | −0.54 (0.26) | −0.54 (0.26) | −0.54 (0.26) | 0.543 |
| **PRS for CKD category, n (%)** |  |  |  | 0.294 |
| Low risk | 13,063 (33.2) | 9,094 (33.2) | 3,969 (33.7) |  |
| Intermediate risk | 13,062 (33.2) | 9,125 (33.3) | 3,937 (33.5) |  |
| High risk | 13,061 (33.2) | 9,205 (33.6) | 3,856 (32.8) |  |
| **Incident CKD, n (%)** |  |  |  | 0.013 |
| No | 37,586 (95.5) | 26,358 (95.7) | 11,228 (95.1) |  |
| Yes | 1,757 (4.5) | 1,183 (4.3) | 574 (4.9) |  |
| **Abbreviations:** CKD, chronic kidney disease; SD, standard deviation; IQR, interquartile range; TDI, Townsend Deprivation Index; BMI, body mass index; eGFR, estimated glomerular filtration rate; CVD, cardiovascular disease; PRS, polygenic risk score. | | | | |
