# Supplementary material
Source: Research Square preprint supplement (doi:10.21203/rs.3.rs-9437706/v1)
Supplement: Supplementary file 5 [file 945c0bb5320f6b218cc8ce87.xlsx]

## Sheet: AL_CKD_Mediation_Train_Results
Supporting Table 5. Detailed Mediation Analysis Results Of 2911 Proteins In The Association Between Allostatic Load And CKD
Protein	Total Effect	ACME	Proportion Mediated	P value	FDR
ABCA2	-1.05385	-0.0486826	0.0461949	< 0.001	< 0.001
ACE	-1.0701	-0.01569	0.0146621	< 0.001	< 0.001
ACE2	-1.02847	-0.234197	0.227715	< 0.001	< 0.001
ACP6	-1.06426	-0.0232043	0.0218033	< 0.001	< 0.001
ACTA2	-1.04562	-0.0672192	0.0642862	< 0.001	< 0.001
ACTN2	-1.06628	-0.0269472	0.0252722	< 0.001	< 0.001
ACVRL1	-1.05229	-0.239659	0.227751	< 0.001	< 0.001
ADA2	-0.993656	-0.192711	0.193941	< 0.001	< 0.001
ADAM12	-1.02967	-0.195241	0.189616	< 0.001	< 0.001
ADAM8	-1.07785	-0.132484	0.122915	< 0.001	< 0.001
ADAM9	-1.03892	-0.0888452	0.0855165	< 0.001	< 0.001
ADAMTS1	-1.05173	-0.0304373	0.0289402	< 0.001	< 0.001
ADAMTS15	-1.05127	-0.257396	0.244843	< 0.001	< 0.001
ADAMTS16	-1.05644	-0.0201098	0.0190354	< 0.001	< 0.001
ADAMTSL2	-0.950987	-0.447612	0.470681	< 0.001	< 0.001
ADGRB3	-1.06023	0.0207663	-0.0195867	< 0.001	< 0.001
ADGRD1	-1.07451	-0.149735	0.139352	< 0.001	< 0.001
ADGRE2	-1.04567	-0.0837197	0.0800632	< 0.001	< 0.001
ADGRE5	-1.04115	-0.115845	0.111267	< 0.001	< 0.001
ADGRG1	-0.909145	-0.220302	0.242317	< 0.001	< 0.001
ADGRG2	-1.0766	-0.0872405	0.0810334	< 0.001	< 0.001
ADM	-1.19059	-0.532939	0.447626	< 0.001	< 0.001
AFP	-1.0673	0.0334626	-0.0313525	< 0.001	< 0.001
AGR2	-1.06358	-0.0228215	0.0214573	< 0.001	< 0.001
AGRN	-1.03337	-0.274563	0.265697	< 0.001	< 0.001
AHNAK	-1.07044	-0.119882	0.111992	< 0.001	< 0.001
AHNAK2	-1.05802	-0.0336656	0.0318194	< 0.001	< 0.001
ALCAM	-1.04971	-0.0849469	0.0809242	< 0.001	< 0.001
ALDH3A1	-1.03807	-0.0506831	0.0488245	< 0.001	< 0.001
AMBP	-1.15454	-0.270411	0.234216	< 0.001	< 0.001
AMOT	-1.04335	-0.0851079	0.0815722	< 0.001	< 0.001
ANG	-1.09304	-0.117455	0.107457	< 0.001	< 0.001
ANGPT2	-0.99107	-0.189905	0.191617	< 0.001	< 0.001
ANGPTL1	-1.05699	-0.0513094	0.0485428	< 0.001	< 0.001
ANGPTL2	-1.07325	-0.210557	0.196186	< 0.001	< 0.001
ANGPTL4	-1.08792	-0.19647	0.180592	< 0.001	< 0.001
ANGPTL7	-1.05116	-0.0885626	0.0842519	< 0.001	< 0.001
ANXA5	-1.06335	-0.021083	0.0198271	< 0.001	< 0.001
APOA2	-1.05526	0.0874004	-0.0828233	< 0.001	< 0.001
APOC1	-1.0594	-0.0201089	0.0189814	< 0.001	< 0.001
APOF	-1.06521	-0.112469	0.105584	< 0.001	< 0.001
APOM	-1.02457	-0.0356551	0.0348	< 0.001	< 0.001
AREG	-0.989999	-0.148796	0.150299	< 0.001	< 0.001
ASGR1	-1.08717	-0.445015	0.409332	< 0.001	< 0.001
ASGR2	-1.06752	-0.129735	0.121529	< 0.001	< 0.001
ATRAID	-1.06129	-0.0480276	0.0452541	< 0.001	< 0.001
AXL	-1.05561	-0.0515123	0.0487986	< 0.001	< 0.001
B2M	-1.0904	-0.121521	0.111446	< 0.001	< 0.001
B3GNT7	-1.06056	-0.121287	0.114361	< 0.001	< 0.001
B4GALT1	-1.06509	-0.223882	0.210201	< 0.001	< 0.001
BAIAP2	-1.05328	-0.254594	0.241717	< 0.001	< 0.001
BCAM	-1.0488	-0.0472201	0.0450227	< 0.001	< 0.001
BCAN	-1.08276	-0.11081	0.10234	< 0.001	< 0.001
BMP6	-1.05496	-0.0510268	0.0483683	< 0.001	< 0.001
BMPER	-1.02079	-0.273673	0.268099	< 0.001	< 0.001
BPIFB2	-1.07189	-0.142477	0.132922	< 0.001	< 0.001
BRK1	-1.07719	-0.0320756	0.0297772	< 0.001	< 0.001
BSG	-1.07602	-0.2039	0.189495	< 0.001	< 0.001
BST2	-1.06145	-0.205724	0.193815	< 0.001	< 0.001
BTN2A1	-1.03355	-0.123349	0.119346	< 0.001	< 0.001
BTN3A2	-1.06847	-0.101988	0.0954525	< 0.001	< 0.001
C1QTNF1	-1.06142	-0.18024	0.169809	< 0.001	< 0.001
C1RL	-1.07241	-0.0976009	0.0910109	< 0.001	< 0.001
C7	-1.00133	-0.0483359	0.0482715	< 0.001	< 0.001
CA3	-1.05678	-0.0189359	0.0179185	< 0.001	< 0.001
CA4	-1.06309	0.020842	-0.019605	< 0.001	< 0.001
CA6	-1.0755	-0.0817177	0.0759811	< 0.001	< 0.001
CA9	-1.04829	0.0169136	-0.0161345	< 0.001	< 0.001
CALB1	-1.04231	0.0426798	-0.0409472	< 0.001	< 0.001
CALB2	-1.08869	-0.0989984	0.0909335	< 0.001	< 0.001
CALCA	-1.05122	-0.202495	0.192629	< 0.001	< 0.001
CALCB	-1.05456	0.0109442	-0.010378	< 0.001	< 0.001
CANT1	-1.06507	-0.167862	0.157606	< 0.001	< 0.001
CCDC80	-1.05231	-0.136711	0.129915	< 0.001	< 0.001
CCL14	-1.06927	-0.097016	0.0907309	< 0.001	< 0.001
CCL15	-1.05762	-0.0987053	0.0933274	< 0.001	< 0.001
CCL16	-1.08557	-0.219258	0.201976	< 0.001	< 0.001
CCL20	-1.05696	-0.12441	0.117706	< 0.001	< 0.001
CCL21	-1.05494	-0.0809326	0.0767179	< 0.001	< 0.001
CCL23	-1.06794	-0.106682	0.0998955	< 0.001	< 0.001
CCL25	-1.08556	-0.037235	0.0343002	< 0.001	< 0.001
CCL3	-1.06953	-0.119888	0.112094	< 0.001	< 0.001
CCL7	-1.08472	-0.143261	0.132072	< 0.001	< 0.001
CCN3	-1.07094	-0.132523	0.123744	< 0.001	< 0.001
CCN4	-1.05697	-0.153728	0.145443	< 0.001	< 0.001
CCN5	-1.06924	-0.16991	0.158907	< 0.001	< 0.001
CD14	-1.08743	-0.107844	0.0991733	< 0.001	< 0.001
CD160	-1.06275	-0.0494292	0.0465109	< 0.001	< 0.001
CD163	-1.06271	-0.205684	0.193545	< 0.001	< 0.001
CD207	-1.05386	-0.0202803	0.019244	< 0.001	< 0.001
CD27	-1.04018	-0.143521	0.137978	< 0.001	< 0.001
CD274	-1.06106	-0.164908	0.155418	< 0.001	< 0.001
CD28	-1.05488	-0.123306	0.116891	< 0.001	< 0.001
CD300A	-1.03914	-0.191276	0.184071	< 0.001	< 0.001
CD300C	-1.04774	-0.219824	0.209809	< 0.001	< 0.001
CD300E	-1.07706	-0.351087	0.325967	< 0.001	< 0.001
CD300LF	-1.05215	-0.061766	0.0587043	< 0.001	< 0.001
CD300LG	-1.05604	0.0855241	-0.0809858	< 0.001	< 0.001
CD302	-1.0552	-0.221061	0.209497	< 0.001	< 0.001
CD38	-1.04054	-0.152434	0.146495	< 0.001	< 0.001
CD4	-1.07844	-0.168076	0.155851	< 0.001	< 0.001
CD40	-1.06971	-0.0773399	0.0723002	< 0.001	< 0.001
CD46	-1.0688	-0.098523	0.0921806	< 0.001	< 0.001
CD48	-1.05579	-0.100421	0.0951146	< 0.001	< 0.001
CD5	-1.06791	-0.108945	0.102017	< 0.001	< 0.001
CD55	-1.05823	-0.0268713	0.0253928	< 0.001	< 0.001
CD59	-1.05116	-0.216074	0.205558	< 0.001	< 0.001
CD7	-1.06844	-0.0488993	0.045767	< 0.001	< 0.001
CD70	-1.05935	-0.0303877	0.0286853	< 0.001	< 0.001
CD72	-1.05833	-0.200559	0.189506	< 0.001	< 0.001
CD74	-1.07546	-0.310624	0.288829	< 0.001	< 0.001
CD79B	-1.02761	-0.144562	0.140678	< 0.001	< 0.001
CD80	-1.03597	-0.261212	0.252142	< 0.001	< 0.001
CD83	-1.05079	-0.174237	0.165814	< 0.001	< 0.001
CD8A	-1.06028	-0.0413571	0.0390059	< 0.001	< 0.001
CD93	-1.03825	0.0259657	-0.0250092	< 0.001	< 0.001
CD99	-1.07052	-0.048207	0.0450315	< 0.001	< 0.001
CD99L2	-1.09679	-0.176137	0.160593	< 0.001	< 0.001
CDCP1	-1.06594	-0.145195	0.136213	< 0.001	< 0.001
CDH1	-1.06537	-0.106328	0.0998034	< 0.001	< 0.001
CDH15	-1.0513	-0.0514623	0.048951	< 0.001	< 0.001
CDH2	-1.05148	-0.2939	0.27951	< 0.001	< 0.001
CDH3	-1.03856	0.0400135	-0.038528	< 0.001	< 0.001
CEACAM19	-1.05711	-0.0184537	0.0174568	< 0.001	< 0.001
CEACAM21	-1.06275	-0.0338775	0.0318773	< 0.001	< 0.001
CEACAM6	-1.05057	-0.0247667	0.0235745	< 0.001	< 0.001
CEACAM8	-1.06037	-0.0853524	0.0804932	< 0.001	< 0.001
CELSR2	-1.0485	-0.0291326	0.027785	< 0.001	< 0.001
CFC1	-1.05688	-0.0536489	0.0507616	< 0.001	< 0.001
CFD	-1.06288	-0.0925003	0.0870281	< 0.001	< 0.001
CFI	-1.1199	-0.253234	0.226122	< 0.001	< 0.001
CGREF1	-1.05991	-0.135862	0.128182	< 0.001	< 0.001
CHAD	-1.05988	-0.0770636	0.0727099	< 0.001	< 0.001
CHCHD10	-1.0558	-0.343887	0.325712	< 0.001	< 0.001
CHCHD6	-1.07503	-0.113034	0.105146	< 0.001	< 0.001
CHGB	-1.05202	0.0462359	-0.0439498	< 0.001	< 0.001
CHI3L1	-1.05395	-0.253996	0.240995	< 0.001	< 0.001
CHRDL1	-1.036	-0.154957	0.149572	< 0.001	< 0.001
CHRDL2	-1.01251	-0.0786211	0.0776498	< 0.001	< 0.001
CILP	-1.0588	-0.219597	0.207401	< 0.001	< 0.001
CKAP4	-1.01762	-0.181695	0.178549	< 0.001	< 0.001
CKB	-1.03955	0.148851	-0.143188	< 0.001	< 0.001
CLC	-1.05451	-0.0115372	0.0109409	< 0.001	< 0.001
CLEC10A	-1.05998	-0.0215425	0.0203235	< 0.001	< 0.001
CLEC14A	-1.03604	-0.0450367	0.0434701	< 0.001	< 0.001
CLEC1A	-1.06666	-0.048546	0.045512	< 0.001	< 0.001
CLEC4D	-1.06464	-0.175036	0.164408	< 0.001	< 0.001
CLEC5A	-1.05336	-0.0156817	0.0148874	< 0.001	< 0.001
CLEC6A	-1.06077	-0.110819	0.10447	< 0.001	< 0.001
CLEC7A	-1.061	-0.0646378	0.0609219	< 0.001	< 0.001
CLGN	-1.06715	-0.078687	0.0737357	< 0.001	< 0.001
CLMP	-1.11293	-0.216344	0.19439	< 0.001	< 0.001
CLSTN2	-1.00895	-0.0423648	0.041989	< 0.001	< 0.001
CLSTN3	-1.05248	-0.140984	0.133953	< 0.001	< 0.001
COL15A1	-1.05032	-0.123246	0.117341	< 0.001	< 0.001
COL18A1	-1.07241	-0.333071	0.310582	< 0.001	< 0.001
COL3A1	-1.05607	-0.0669074	0.0633549	< 0.001	< 0.001
COL4A1	-0.995642	0.0687876	-0.0690887	< 0.001	< 0.001
COL5A1	-1.03974	-0.0563386	0.0541852	< 0.001	< 0.001
COL6A3	-1.03953	-0.451958	0.434772	< 0.001	< 0.001
COLEC12	-1.05097	-0.319875	0.304362	< 0.001	< 0.001
CPA2	-1.07486	-0.0225531	0.0209823	< 0.001	< 0.001
CPM	-1.09978	-0.287938	0.261814	< 0.001	< 0.001
CPVL	-1.06176	-0.04099	0.0386056	< 0.001	< 0.001
CPXM2	-1.05305	-0.115838	0.110003	< 0.001	< 0.001
CR1	-1.05358	-0.0797808	0.0757235	< 0.001	< 0.001
CR2	-1.05068	-0.0349824	0.0332949	< 0.001	< 0.001
CRELD1	-1.07481	-0.36826	0.342629	< 0.001	< 0.001
CRELD2	-1.06296	-0.0845443	0.079537	< 0.001	< 0.001
CRHBP	-1.07785	-0.260385	0.241579	< 0.001	< 0.001
CRIM1	-1.01649	-0.0641326	0.063092	< 0.001	< 0.001
CRIP2	-1.07787	-0.144783	0.134323	< 0.001	< 0.001
CRISP3	-1.07895	-0.021737	0.0201463	< 0.001	< 0.001
CRLF1	-1.05228	-0.0991487	0.0942229	< 0.001	< 0.001
CRTAM	-1.06316	-0.0339108	0.0318962	< 0.001	< 0.001
CSF1	-1.05959	-0.406715	0.383843	< 0.001	< 0.001
CSF1R	-1.0437	-0.118926	0.113946	< 0.001	< 0.001
CSF3	-1.07514	-0.0740575	0.0688814	< 0.001	< 0.001
CSPG4	-1.05173	0.0091676	-0.00871669	< 0.001	< 0.001
CST3	-1.08607	-0.356825	0.328547	< 0.001	< 0.001
CST5	-1.07587	0.0121523	-0.0112954	< 0.001	< 0.001
CST7	-1.0604	-0.0606724	0.0572167	< 0.001	< 0.001
CSTB	-1.08232	-0.18181	0.167981	< 0.001	< 0.001
CTBS	-1.06672	-0.0762456	0.0714768	< 0.001	< 0.001
CTHRC1	-1.06741	-0.208257	0.195105	< 0.001	< 0.001
CTSD	-1.0441	-0.267502	0.256205	< 0.001	< 0.001
CTSE	-1.06624	-0.0166272	0.0155943	< 0.001	< 0.001
CTSL	-1.06406	-0.151774	0.142636	< 0.001	< 0.001
CTSO	-1.05043	-0.196793	0.187345	< 0.001	< 0.001
CTSZ	-1.05696	-0.255512	0.241742	< 0.001	< 0.001
CX3CL1	-1.0533	0.040295	-0.0382561	< 0.001	< 0.001
CXADR	-1.07332	-0.140021	0.130456	< 0.001	< 0.001
CXCL10	-1.06273	-0.102246	0.096211	< 0.001	< 0.001
CXCL11	-1.06298	-0.0705421	0.0663624	< 0.001	< 0.001
CXCL13	-1.04424	-0.104845	0.100403	< 0.001	< 0.001
CXCL16	-1.09033	-0.153093	0.14041	< 0.001	< 0.001
CXCL9	-1.06256	-0.0772037	0.0726584	< 0.001	< 0.001
CYTL1	-1.04989	0.0163185	-0.0155431	< 0.001	< 0.001
DCN	-1.04632	0.0258029	-0.0246606	< 0.001	< 0.001
DDAH1	-1.06237	-0.145893	0.137328	< 0.001	< 0.001
DDR1	-1.03933	-0.0878799	0.0845542	< 0.001	< 0.001
DEFA1_DEFA1B	-1.06586	-0.0757678	0.0710864	< 0.001	< 0.001
DEFB103A_DEFB103B	-1.05534	-0.0233609	0.0221358	< 0.001	< 0.001
DEFB4A_DEFB4B	-1.07696	-0.125104	0.116164	< 0.001	< 0.001
DKK3	-1.0355	0.0635968	-0.0614164	< 0.001	< 0.001
DKK4	-1.06812	-0.114448	0.107148	< 0.001	< 0.001
DLK1	-1.06183	-0.0377316	0.0355345	< 0.001	< 0.001
DLL1	-1.07613	-0.215863	0.200592	< 0.001	< 0.001
DMD	-1.0571	-0.0433274	0.0409871	< 0.001	< 0.001
DMP1	-1.0694	-0.085559	0.0800064	< 0.001	< 0.001
DNER	-1.06949	-0.0624252	0.0583689	< 0.001	< 0.001
DNM3	-1.06967	-0.0599818	0.0560751	< 0.001	< 0.001
DPP4	-1.05996	0.0700282	-0.0660665	< 0.001	< 0.001
DPT	-1.10519	-0.207325	0.187592	< 0.001	< 0.001
DPY30	-1.08359	-0.175811	0.162248	< 0.001	< 0.001
DRAXIN	-1.05499	-0.0363128	0.0344199	< 0.001	< 0.001
DSC2	-1.05469	-0.106053	0.100553	< 0.001	< 0.001
DSG2	-1.04847	0.177656	-0.169443	< 0.001	< 0.001
DTNB	-1.05917	-0.21656	0.204461	< 0.001	< 0.001
DTX3	-1.05695	-0.0829719	0.0785014	< 0.001	< 0.001
EDA2R	-1.00202	-0.0932846	0.0930968	< 0.001	< 0.001
EDN1	-1.0627	-0.148855	0.140072	< 0.001	< 0.001
EFCAB14	-1.05326	-0.0994547	0.0944258	< 0.001	< 0.001
EFEMP1	-1.07061	-0.19088	0.178291	< 0.001	< 0.001
EFHD1	-1.06237	-0.075861	0.0714071	< 0.001	< 0.001
EFNA1	-1.09645	-0.236096	0.215327	< 0.001	< 0.001
EFNA4	-1.05214	-0.307733	0.292483	< 0.001	< 0.001
EGFL7	-1.06682	-0.0693706	0.0650255	< 0.001	< 0.001
ELN	-1.05979	-0.056181	0.0530114	< 0.001	< 0.001
ENPP2	-1.03833	-0.0963511	0.0927943	< 0.001	< 0.001
ENPP5	-1.0653	-0.0335738	0.0315159	< 0.001	< 0.001
ENPP6	-1.06434	-0.0654613	0.0615044	< 0.001	< 0.001
ENPP7	-1.06512	-0.145853	0.136935	< 0.001	< 0.001
EPHA1	-1.08123	-0.15173	0.140331	< 0.001	< 0.001
EPHA2	-1.06093	-0.109634	0.103338	< 0.001	< 0.001
EPHB4	-1.04129	-0.0501704	0.0481812	< 0.001	< 0.001
EPO	-1.06448	-0.0706957	0.0664133	< 0.001	< 0.001
EPS8L2	-1.07068	-0.212683	0.198642	< 0.001	< 0.001
ERMAP	-1.06067	-0.0813322	0.0766797	< 0.001	< 0.001
ESAM	-1.05704	-0.0670761	0.0634563	< 0.001	< 0.001
F3	-1.06046	0.0433277	-0.0408575	< 0.001	< 0.001
F9	-1.10177	-0.188827	0.171385	< 0.001	< 0.001
FABP1	-1.07709	-0.359595	0.333859	< 0.001	< 0.001
FABP3	-1.04575	-0.280262	0.268001	< 0.001	< 0.001
FABP4	-1.15217	-0.560125	0.486149	< 0.001	< 0.001
FABP5	-1.06508	-0.0645046	0.0605631	< 0.001	< 0.001
FAM20A	-1.07939	-0.196988	0.1825	< 0.001	< 0.001
FAM3C	-1.09322	-0.183031	0.167423	< 0.001	< 0.001
FAS	-1.04644	-0.111388	0.106445	< 0.001	< 0.001
FBLN2	-1.0243	-0.140834	0.137493	< 0.001	< 0.001
FCAMR	-1.06282	-0.269801	0.253854	< 0.001	< 0.001
FCAR	-1.06089	-0.0942994	0.0888868	< 0.001	< 0.001
FCER2	-1.06123	-0.0815065	0.0768036	< 0.001	< 0.001
FCGR2A	-1.05049	-0.0402059	0.0382735	< 0.001	< 0.001
FCRL2	-1.05365	-0.0426297	0.0404593	< 0.001	< 0.001
FCRL5	-1.04685	-0.0955769	0.0912992	< 0.001	< 0.001
FCRL6	-1.04904	-0.0135002	0.0128691	< 0.001	< 0.001
FCRLB	-1.05457	-0.0582223	0.0552095	< 0.001	< 0.001
FDX1	-1.05925	-0.0436522	0.0412106	< 0.001	< 0.001
FGA	-1.09417	-0.122085	0.111578	< 0.001	< 0.001
FGF21	-1.06542	-0.284895	0.267401	< 0.001	< 0.001
FGF23	-1.04569	-0.114177	0.109188	< 0.001	< 0.001
FGFBP1	-1.05565	-0.0442552	0.0419221	< 0.001	< 0.001
FGFR2	-1.04421	-0.317116	0.303691	< 0.001	< 0.001
FGL1	-1.06046	-0.0357072	0.0336713	< 0.001	< 0.001
FLRT2	-1.00866	-0.0466341	0.0462339	< 0.001	< 0.001
FOLR1	-1.02271	0.0654711	-0.064017	< 0.001	< 0.001
FOLR2	-1.06056	-0.103062	0.0971771	< 0.001	< 0.001
FSTL1	-1.01444	-0.162932	0.160612	< 0.001	< 0.001
FSTL3	-0.996836	-0.590068	0.591941	< 0.001	< 0.001
FURIN	-1.09163	-0.209966	0.192342	< 0.001	< 0.001
FUT3_FUT5	-1.05076	-0.089175	0.0848674	< 0.001	< 0.001
GALNT10	-1.05727	-0.155103	0.146701	< 0.001	< 0.001
GALNT3	-1.06365	-0.0294469	0.0276847	< 0.001	< 0.001
GAS6	-1.05809	-0.0884496	0.0835938	< 0.001	< 0.001
GAST	-1.05509	-0.0459901	0.0435887	< 0.001	< 0.001
GCHFR	-1.0673	-0.135543	0.126996	< 0.001	< 0.001
GCNT1	-1.0649	-0.0830126	0.0779532	< 0.001	< 0.001
GDF15	-1.00736	-0.450845	0.447551	< 0.001	< 0.001
GDNF	-1.05555	-0.0949435	0.0899474	< 0.001	< 0.001
GFRA1	-1.07726	-0.44439	0.412517	< 0.001	< 0.001
GGT5	-1.02005	-0.0501751	0.0491888	< 0.001	< 0.001
GIPC2	-1.06357	-0.130289	0.122502	< 0.001	< 0.001
GM2A	-1.07086	-0.0949858	0.0887002	< 0.001	< 0.001
GOLM2	-1.0673	-0.229507	0.215035	< 0.001	< 0.001
GPC5	-1.07136	0.0125935	-0.0117547	< 0.001	< 0.001
GPD1	-1.06845	-0.147451	0.138005	< 0.001	< 0.001
GPNMB	-1.05614	-0.0533517	0.0505157	< 0.001	< 0.001
GPR15L	-1.07459	-0.0483143	0.0449605	< 0.001	< 0.001
GPR37	-1.07229	-0.219864	0.205043	< 0.001	< 0.001
GRN	-1.08322	-0.174817	0.161386	< 0.001	< 0.001
GUCA2A	-1.06416	0.1156	-0.10863	< 0.001	< 0.001
GUSB	-1.04809	-0.200574	0.191372	< 0.001	< 0.001
HAVCR1	-1.03149	-0.523566	0.507585	< 0.001	< 0.001
HAVCR2	-1.05749	-0.295448	0.279386	< 0.001	< 0.001
HEG1	-1.06171	-0.175567	0.165363	< 0.001	< 0.001
HEPH	-1.05736	-0.118682	0.112243	< 0.001	< 0.001
HGF	-1.06368	-0.463431	0.435685	< 0.001	< 0.001
HIP1R	-1.05887	-0.170608	0.161123	< 0.001	< 0.001
HJV	-1.07788	-0.0953491	0.08846	< 0.001	< 0.001
HLA_A	-1.06734	-0.0222386	0.0208355	< 0.001	< 0.001
HLA_E	-1.05844	-0.0834475	0.0788401	< 0.001	< 0.001
HNMT	-1.0401	-0.32007	0.30773	< 0.001	< 0.001
HRC	-1.02968	0.037372	-0.0362948	< 0.001	< 0.001
HS6ST2	-1.01062	0.0319323	-0.0315967	< 0.001	< 0.001
HSPA2	-1.06272	-0.0461672	0.0434423	< 0.001	< 0.001
HSPB6	-1.08715	-0.249149	0.229176	< 0.001	< 0.001
HSPG2	-1.0534	-0.28424	0.26983	< 0.001	< 0.001
HYAL1	-1.06538	-0.0902984	0.0847572	< 0.001	< 0.001
HYOU1	-1.08609	-0.0736242	0.0677886	< 0.001	< 0.001
ICAM1	-1.07237	-0.24972	0.232867	< 0.001	< 0.001
ICAM2	-1.06497	-0.0279155	0.0262125	< 0.001	< 0.001
ICAM3	-1.05487	-0.0657893	0.0623675	< 0.001	< 0.001
IDI2	-1.06968	-0.0307812	0.0287762	< 0.001	< 0.001
IFI30	-1.0731	-0.305903	0.285065	< 0.001	< 0.001
IFNGR1	-1.02729	-0.029986	0.0291894	< 0.001	< 0.001
IFNLR1	-1.07595	-0.131575	0.122287	< 0.001	< 0.001
IGF1R	-1.06387	-0.0794576	0.0746876	< 0.001	< 0.001
IGF2R	-1.07698	-0.241462	0.224202	< 0.001	< 0.001
IGFBP2	-1.02976	0.178116	-0.172968	< 0.001	< 0.001
IGFBP4	-1.04812	-0.453394	0.432577	< 0.001	< 0.001
IGFBP6	-1.01803	-0.0985246	0.0967798	< 0.001	< 0.001
IGFBP7	-1.01767	-0.194537	0.19116	< 0.001	< 0.001
IGFBPL1	-0.975531	-0.27045	0.277233	< 0.001	< 0.001
IGLC2	-1.08381	-0.0504228	0.0465235	< 0.001	< 0.001
IGSF3	-1.02026	-0.318978	0.312643	< 0.001	< 0.001
IGSF8	-1.06391	-0.146183	0.137401	< 0.001	< 0.001
IGSF9	-1.07748	-0.29043	0.269545	< 0.001	< 0.001
IL10	-1.06827	-0.0451171	0.0422337	< 0.001	< 0.001
IL10RB	-1.07328	-0.323569	0.301476	< 0.001	< 0.001
IL12A_IL12B	-1.04883	-0.11916	0.113612	< 0.001	< 0.001
IL12B	-1.05196	-0.115721	0.110006	< 0.001	< 0.001
IL12RB1	-1.06598	-0.0985456	0.0924461	< 0.001	< 0.001
IL15	-1.07451	-0.0313795	0.0292035	< 0.001	< 0.001
IL15RA	-1.06734	-0.0664747	0.0622808	< 0.001	< 0.001
IL17A	-1.05578	-0.014008	0.013268	< 0.001	< 0.001
IL17C	-1.05055	-0.0464299	0.0441959	< 0.001	< 0.001
IL18	-1.06405	-0.143713	0.135063	< 0.001	< 0.001
IL18BP	-1.04796	-0.200271	0.191105	< 0.001	< 0.001
IL18R1	-1.08111	-0.33359	0.308562	< 0.001	< 0.001
IL19	-1.05129	-0.0881281	0.0838287	< 0.001	< 0.001
IL1RL1	-1.04752	-0.107009	0.102155	< 0.001	< 0.001
IL1RN	-1.07848	-0.384063	0.356116	< 0.001	< 0.001
IL22	-1.05813	-0.0448453	0.0423818	< 0.001	< 0.001
IL2RA	-1.07373	-0.169508	0.157868	< 0.001	< 0.001
IL4R	-1.05991	-0.0874888	0.0825434	< 0.001	< 0.001
IL5RA	-1.04881	-0.0394404	0.037605	< 0.001	< 0.001
IL6	-1.07872	-0.257468	0.238679	< 0.001	< 0.001
IL6ST	-1.06906	-0.0923851	0.0864172	< 0.001	< 0.001
IMMT	-1.0669	-0.235384	0.220624	< 0.001	< 0.001
INHBB	-1.03792	-0.224684	0.216476	< 0.001	< 0.001
INHBC	-1.08765	-0.182629	0.167912	< 0.001	< 0.001
INSL4	-1.05831	-0.0158888	0.0150134	< 0.001	< 0.001
INSL5	-1.08289	-0.1093	0.100933	< 0.001	< 0.001
INSR	-1.05562	-0.0361212	0.0342179	< 0.001	< 0.001
ITGA5	-1.07653	-0.21143	0.196399	< 0.001	< 0.001
ITGAV	-1.07259	-0.0580514	0.0541227	< 0.001	< 0.001
ITGBL1	-0.932084	-0.195475	0.209719	< 0.001	< 0.001
ITIH3	-1.06471	0.023533	-0.0221027	< 0.001	< 0.001
JAM2	-1.03245	-0.0335782	0.0325227	< 0.001	< 0.001
JUN	-1.06385	-0.0231888	0.0217971	< 0.001	< 0.001
KIF1C	-1.06162	-0.041369	0.0389677	< 0.001	< 0.001
KLK11	-1.03491	-0.014607	0.0141142	< 0.001	< 0.001
KLK4	-1.0295	0.0192105	-0.01866	< 0.001	< 0.001
KLK8	-1.05667	-0.0217692	0.0206017	< 0.001	< 0.001
KLRB1	-1.0481	-0.113449	0.108243	< 0.001	< 0.001
KLRD1	-1.07305	-0.0981632	0.0914809	< 0.001	< 0.001
KLRF1	-1.05501	-0.03397	0.0321988	< 0.001	< 0.001
KLRK1	-1.0681	-0.047079	0.0440772	< 0.001	< 0.001
KRT18	-1.03619	-0.360865	0.348262	< 0.001	< 0.001
KRT19	-1.06128	-0.0355378	0.0334858	< 0.001	< 0.001
KRT8	-0.970133	-0.114523	0.118049	< 0.001	< 0.001
LAG3	-1.06026	-0.0254302	0.0239849	< 0.001	< 0.001
LAIR1	-1.05696	-0.222158	0.210186	< 0.001	< 0.001
LAIR2	-1.0629	-0.0263771	0.0248162	< 0.001	< 0.001
LAMA4	-1.05823	-0.0600212	0.0567182	< 0.001	< 0.001
LAMB1	-1.05066	-0.0708728	0.0674553	< 0.001	< 0.001
LAMP3	-1.06489	-0.0904175	0.0849079	< 0.001	< 0.001
LBP	-1.07927	-0.106465	0.0986454	< 0.001	< 0.001
LCN2	-1.06216	-0.0738037	0.0694848	< 0.001	< 0.001
LECT2	-1.07	-0.0866254	0.0809581	< 0.001	< 0.001
LEFTY2	-1.04597	-0.0143592	0.0137281	< 0.001	< 0.001
LEO1	-1.06737	-0.0252553	0.0236612	< 0.001	< 0.001
LEP	-1.11564	-0.328645	0.294581	< 0.001	< 0.001
LETM1	-1.0662	-0.0706563	0.0662695	< 0.001	< 0.001
LGALS1	-1.09659	-0.190429	0.173655	< 0.001	< 0.001
LGALS3	-1.10667	-0.0997336	0.0901201	< 0.001	< 0.001
LGALS3BP	-1.06938	-0.169234	0.158254	< 0.001	< 0.001
LGALS4	-1.04786	-0.317791	0.303275	< 0.001	< 0.001
LGALS7_LGALS7B	-1.08383	-0.033719	0.0311108	< 0.001	< 0.001
LGALS9	-1.11882	-0.51961	0.464426	< 0.001	< 0.001
LIF	-1.06759	-0.0486535	0.0455731	< 0.001	< 0.001
LIFR	-1.03025	-0.0471185	0.0457352	< 0.001	< 0.001
LILRA2	-1.07172	-0.0939532	0.0876655	< 0.001	< 0.001
LILRA5	-1.11019	-0.283553	0.255408	< 0.001	< 0.001
LILRB1	-1.06585	-0.093655	0.0878692	< 0.001	< 0.001
LILRB2	-1.06745	-0.0893147	0.0836711	< 0.001	< 0.001
LILRB4	-1.0882	-0.228394	0.209881	< 0.001	< 0.001
LMNB2	-1.09812	-0.242002	0.220379	< 0.001	< 0.001
LMOD1	-1.04696	-0.0270876	0.0258727	< 0.001	< 0.001
LPCAT2	-1.05578	-0.0230874	0.0218676	< 0.001	< 0.001
LPO	-1.04347	-0.0421221	0.0403673	< 0.001	< 0.001
LRG1	-1.08988	-0.0474302	0.0435189	< 0.001	< 0.001
LRIG1	-1.08427	-0.0761733	0.0702532	< 0.001	< 0.001
LRIG3	-1.06566	-0.0273167	0.0256336	< 0.001	< 0.001
LRP11	-1.06682	-0.171553	0.160808	< 0.001	< 0.001
LRRC25	-1.06354	-0.101423	0.0953642	< 0.001	< 0.001
LRRN1	-1.07252	-0.0257533	0.024012	< 0.001	< 0.001
LTBP3	-1.05627	-0.119017	0.112676	< 0.001	< 0.001
LTBR	-1.0395	-0.15259	0.146792	< 0.001	< 0.001
LY6D	-1.08016	-0.0302384	0.0279944	< 0.001	< 0.001
LY9	-1.05516	-0.103422	0.0980152	< 0.001	< 0.001
LY96	-1.06336	-0.09335	0.0877879	< 0.001	< 0.001
MAD1L1	-1.07283	-0.159006	0.148212	< 0.001	< 0.001
MAMDC2	-1.03107	-0.0746801	0.0724298	< 0.001	< 0.001
MANSC1	-1.04103	0.0426677	-0.0409861	< 0.001	< 0.001
MARCO	-1.06392	-0.117581	0.110516	< 0.001	< 0.001
MATN2	-1.06663	-0.0928321	0.0870327	< 0.001	< 0.001
MB	-1.04658	-0.0640026	0.061154	< 0.001	< 0.001
MDK	-1.07427	-0.0623804	0.0580676	< 0.001	< 0.001
MERTK	-1.08156	-0.06527	0.0603481	< 0.001	< 0.001
MFAP4	-1.0198	-0.0665592	0.065267	< 0.001	< 0.001
MFAP5	-1.05939	-0.224821	0.212218	< 0.001	< 0.001
MFGE8	-1.06526	-0.120227	0.112861	< 0.001	< 0.001
MICB_MICA	-1.07537	-0.0382765	0.0355937	< 0.001	< 0.001
MILR1	-1.0358	-0.057289	0.0553087	< 0.001	< 0.001
MLN	-1.08233	-0.0531041	0.0490648	< 0.001	< 0.001
MMP10	-1.05236	0.0146202	-0.0138928	< 0.001	< 0.001
MMP12	-1.03829	-0.114404	0.110185	< 0.001	< 0.001
MMP3	-1.06469	0.025882	-0.0243094	< 0.001	< 0.001
MMP7	-1.06372	-0.239272	0.224939	< 0.001	< 0.001
MMP8	-1.06563	-0.0743494	0.0697707	< 0.001	< 0.001
MMP9	-1.07587	-0.0681083	0.0633053	< 0.001	< 0.001
MPO	-1.06179	-0.0819519	0.0771826	< 0.001	< 0.001
MRC1	-1.0669	-0.240665	0.225574	< 0.001	< 0.001
MSMB	-1.05805	0.0191637	-0.0181123	< 0.001	< 0.001
MSR1	-1.08078	-0.320693	0.296725	< 0.001	< 0.001
MTUS1	-1.05298	-0.116081	0.110241	< 0.001	< 0.001
MUC13	-1.06077	-0.191942	0.180946	< 0.001	< 0.001
MYBPC1	-1.06306	-0.0644492	0.060626	< 0.001	< 0.001
MYL1	-1.04761	-0.00679123	0.00648259	< 0.001	< 0.001
MYL3	-1.06672	-0.0439989	0.0412468	< 0.001	< 0.001
MZB1	-1.04639	-0.194171	0.185562	< 0.001	< 0.001
NBL1	-1.03683	-0.10871	0.104848	< 0.001	< 0.001
NCAN	-1.07868	-0.0860198	0.0797457	< 0.001	< 0.001
NCR1	-1.05328	-0.08378	0.0795418	< 0.001	< 0.001
NCS1	-1.06801	-0.0394336	0.0369225	< 0.001	< 0.001
NEB	-1.06534	-0.0249509	0.0234207	< 0.001	< 0.001
NECTIN2	-1.06612	-0.272664	0.255753	< 0.001	< 0.001
NECTIN4	-1.03104	0.0308164	-0.0298887	< 0.001	< 0.001
NEFL	-1.07627	0.031007	-0.0288097	< 0.001	< 0.001
NELL1	-1.08147	-0.0203469	0.0188141	< 0.001	< 0.001
NFASC	-1.00388	-0.250668	0.2497	< 0.001	< 0.001
NHLRC3	-1.08356	-0.288372	0.266133	< 0.001	< 0.001
NOMO1	-1.08378	-0.276213	0.254861	< 0.001	< 0.001
NOS1	-1.05105	-0.0689838	0.0656334	< 0.001	< 0.001
NOS3	-1.0625	-0.194755	0.1833	< 0.001	< 0.001
NOTCH3	-1.02798	0.0498376	-0.0484809	< 0.001	< 0.001
NPC2	-1.05411	-0.229042	0.217285	< 0.001	< 0.001
NPDC1	-1.02373	-0.208038	0.203215	< 0.001	< 0.001
NPHS1	-1.05927	0.0283714	-0.0267839	< 0.001	< 0.001
NPL	-1.07677	-0.174406	0.161971	< 0.001	< 0.001
NPPB	-1.0515	0.0320258	-0.0304572	< 0.001	< 0.001
NPPC	-1.04423	-0.0829144	0.0794024	< 0.001	< 0.001
NPY	-1.08246	-0.10017	0.0925399	< 0.001	< 0.001
NRCAM	-1.05008	-0.0914172	0.0870576	< 0.001	< 0.001
NRP2	-1.04572	-0.0370315	0.0354126	< 0.001	< 0.001
NT5C1A	-1.06423	-0.229851	0.215978	< 0.001	< 0.001
NTPROBNP	-0.986761	0.0923192	-0.0935578	< 0.001	< 0.001
NUCB2	-1.07655	-0.103259	0.0959161	< 0.001	< 0.001
OCLN	-1.06162	-0.348404	0.328182	< 0.001	< 0.001
OGN	-1.07015	-0.122997	0.114934	< 0.001	< 0.001
OLR1	-1.05905	-0.0334413	0.0315767	< 0.001	< 0.001
OMG	-1.08224	-0.0344808	0.0318606	< 0.001	< 0.001
ORM1	-1.10042	-0.118296	0.107501	< 0.001	< 0.001
OSCAR	-1.06715	-0.156129	0.146305	< 0.001	< 0.001
OSM	-1.0776	-0.120089	0.111441	< 0.001	< 0.001
OSMR	-1.07357	-0.0535045	0.0498377	< 0.001	< 0.001
PALM	-1.0876	-0.190787	0.175421	< 0.001	< 0.001
PALM2	-1.06179	-0.644007	0.606529	< 0.001	< 0.001
PAM	-1.05979	-0.0765833	0.072263	< 0.001	< 0.001
PAMR1	-1.08663	-0.175769	0.161755	< 0.001	< 0.001
PBXIP1	-1.05347	-0.0486324	0.0461641	< 0.001	< 0.001
PCDH17	-1.02994	-0.0524149	0.0508914	< 0.001	< 0.001
PCSK9	-1.08266	-0.0796348	0.0735545	< 0.001	< 0.001
PDCD1	-1.05658	-0.0867552	0.0821091	< 0.001	< 0.001
PDCD1LG2	-1.05692	-0.0258604	0.0244677	< 0.001	< 0.001
PDGFRA	-1.03563	-0.0145051	0.0140061	< 0.001	< 0.001
PDZK1	-1.03365	-0.222871	0.215616	< 0.001	< 0.001
PENK	-1.02714	-0.0873781	0.0850692	< 0.001	< 0.001
PEPD	-1.05083	0.0410621	-0.0390757	< 0.001	< 0.001
PGA4	-1.05533	0.0104721	-0.00992304	< 0.001	< 0.001
PGF	-1.07482	-0.303597	0.282462	< 0.001	< 0.001
PGLYRP1	-1.06356	-0.0706001	0.0663809	< 0.001	< 0.001
PHLDB1	-1.07906	-0.126525	0.117255	< 0.001	< 0.001
PHOSPHO1	-1.09451	-0.158992	0.145264	< 0.001	< 0.001
PI3	-1.05185	-0.0994476	0.0945452	< 0.001	< 0.001
PIGR	-1.0561	-0.293541	0.277947	< 0.001	< 0.001
PIK3IP1	-1.0484	-0.112965	0.10775	< 0.001	< 0.001
PILRA	-1.07748	-0.230682	0.214093	< 0.001	< 0.001
PILRB	-1.06842	-0.13821	0.129359	< 0.001	< 0.001
PKD1	-1.04595	-0.0530661	0.0507348	< 0.001	< 0.001
PKD2	-1.06763	-0.0597032	0.0559211	< 0.001	< 0.001
PLA2G10	-1.05141	0.0633888	-0.0602895	< 0.001	< 0.001
PLA2G15	-1.04854	-0.312411	0.297948	< 0.001	< 0.001
PLA2G2A	-1.06051	-0.0629306	0.0593402	< 0.001	< 0.001
PLA2G7	-1.05425	0.0636218	-0.060348	< 0.001	< 0.001
PLAUR	-1.05014	-0.315361	0.300305	< 0.001	< 0.001
PLB1	-1.05641	-0.0297077	0.0281214	< 0.001	< 0.001
PLIN1	-1.06771	-0.113386	0.106195	< 0.001	< 0.001
PLIN3	-1.06685	-0.0459007	0.0430245	< 0.001	< 0.001
PLXNB2	-1.03461	-0.220814	0.213427	< 0.001	< 0.001
PNLIPRP1	-1.0711	-0.0364935	0.0340711	< 0.001	< 0.001
POF1B	-1.06081	-0.0242801	0.0228883	< 0.001	< 0.001
POLR2F	-1.07018	-0.115319	0.107756	< 0.001	< 0.001
PON1	-1.06706	-0.0458189	0.0429395	< 0.001	< 0.001
PON3	-1.07523	-0.17661	0.164253	< 0.001	< 0.001
PPL	-1.06395	-0.092738	0.087164	< 0.001	< 0.001
PRAP1	-1.14042	-0.540218	0.473702	< 0.001	< 0.001
PRCP	-1.07477	-0.232212	0.216057	< 0.001	< 0.001
PREB	-1.06069	-0.0409234	0.0385819	< 0.001	< 0.001
PRG2	-1.05465	-0.0351096	0.0332902	< 0.001	< 0.001
PRG3	-1.05595	-0.0109857	0.0104036	< 0.001	< 0.001
PRRT3	-1.03356	0.0876375	-0.0847922	< 0.001	< 0.001
PRSS2	-1.05554	-0.0530963	0.0503023	< 0.001	< 0.001
PRSS22	-1.04008	-0.0401515	0.0386043	< 0.001	< 0.001
PRSS27	-1.05872	-0.0165564	0.0156381	< 0.001	< 0.001
PRSS8	-1.08174	-0.374413	0.346122	< 0.001	< 0.001
PRTN3	-1.05549	-0.0533006	0.0504984	< 0.001	< 0.001
PSAP	-1.07628	-0.149288	0.138707	< 0.001	< 0.001
PSG1	-1.07161	0.0204145	-0.0190503	< 0.001	< 0.001
PSPN	-1.04999	-0.0885305	0.0843158	< 0.001	< 0.001
PTGDS	-1.04049	-0.109256	0.105004	< 0.001	< 0.001
PTH1R	-1.05934	-0.0106283	0.0100329	< 0.001	< 0.001
PTK7	-1.062	-0.0200108	0.0188426	< 0.001	< 0.001
PTN	-1.04646	-0.053989	0.051592	< 0.001	< 0.001
PTPRC	-1.06285	-0.0723522	0.0680735	< 0.001	< 0.001
PTPRK	-1.0629	-0.0423889	0.0398805	< 0.001	< 0.001
PTPRN2	-1.05251	0.0402415	-0.0382339	< 0.001	< 0.001
PTX3	-1.0561	0.0142174	-0.0134622	< 0.001	< 0.001
PVR	-1.03934	-0.11194	0.107703	< 0.001	< 0.001
PYY	-1.07411	-0.0723361	0.0673451	< 0.001	< 0.001
QPCT	-1.04634	-0.177393	0.169537	< 0.001	< 0.001
QSOX1	-1.06104	-0.0471682	0.0444548	< 0.001	< 0.001
RAB44	-1.06016	-0.0223521	0.0210837	< 0.001	< 0.001
RARRES2	-1.12208	-0.325128	0.289754	< 0.001	< 0.001
RBFOX3	-1.0915	-0.283744	0.259957	< 0.001	< 0.001
RBP2	-1.07559	-0.0399027	0.0370983	< 0.001	< 0.001
RBP5	-1.05384	-0.502392	0.476726	< 0.001	< 0.001
RBP7	-1.06456	-0.089092	0.0836887	< 0.001	< 0.001
REG4	-1.0804	-0.0517516	0.0479004	< 0.001	< 0.001
RELT	-1.05275	-0.316825	0.300949	< 0.001	< 0.001
REN	-0.995928	-0.0915424	0.0919166	< 0.001	< 0.001
RETN	-1.06755	-0.0845679	0.0792168	< 0.001	< 0.001
RIDA	-1.04118	-0.2276	0.218599	< 0.001	< 0.001
RNASE1	-1.03637	-0.302666	0.292046	< 0.001	< 0.001
RNASE10	-1.04302	-0.018876	0.0180974	< 0.001	< 0.001
RNASE4	-1.10235	-0.293836	0.266554	< 0.001	< 0.001
RNASE6	-1.09965	-0.173935	0.158174	< 0.001	< 0.001
RNASET2	-1.06367	-0.193349	0.181776	< 0.001	< 0.001
RNF149	-1.07113	-0.183854	0.171644	< 0.001	< 0.001
ROBO1	-1.04311	-0.137782	0.132087	< 0.001	< 0.001
ROBO2	-1.05053	-0.0280019	0.0266551	< 0.001	< 0.001
ROBO4	-1.05254	0.0181204	-0.017216	< 0.001	< 0.001
ROR1	-1.03859	0.0758123	-0.0729951	< 0.001	< 0.001
RSPO1	-1.05027	-0.0118213	0.0112555	< 0.001	< 0.001
RTN4R	-1.08787	-0.252452	0.232061	< 0.001	< 0.001
S100P	-1.06653	-0.0460988	0.043223	< 0.001	< 0.001
SART1	-1.0594	-0.0373933	0.0352966	< 0.001	< 0.001
SCARA5	-1.06897	-0.123672	0.115692	< 0.001	< 0.001
SCARB2	-1.06602	-0.40917	0.383828	< 0.001	< 0.001
SCARF1	-1.0661	-0.0586697	0.0550323	< 0.001	< 0.001
SCARF2	-1.00943	0.0397585	-0.0393871	< 0.001	< 0.001
SCGB3A1	-1.0348	0.0447727	-0.043267	< 0.001	< 0.001
SCGN	-1.06486	0.0319888	-0.0300405	< 0.001	< 0.001
SCN4B	-1.05743	-0.0213045	0.0201475	< 0.001	< 0.001
SCPEP1	-1.06757	-0.120588	0.112956	< 0.001	< 0.001
SCRG1	-1.07768	-0.067487	0.0626226	< 0.001	< 0.001
SDC1	-1.02003	-0.143901	0.141075	< 0.001	< 0.001
SDC4	-1.05346	0.0496742	-0.0471531	< 0.001	< 0.001
SEL1L	-1.06035	-0.103855	0.0979435	< 0.001	< 0.001
SELE	-1.07585	-0.271379	0.252245	< 0.001	< 0.001
SEMA3F	-1.10562	-0.36995	0.334608	< 0.001	< 0.001
SEMA3G	-1.06087	-0.0135625	0.0127843	< 0.001	< 0.001
SEMA7A	-1.03183	-0.115692	0.112123	< 0.001	< 0.001
SEPTIN8	-1.07562	-0.173074	0.160907	< 0.001	< 0.001
SERPINA1	-1.07196	-0.01263	0.0117821	< 0.001	< 0.001
SERPINA9	-1.05749	-0.066498	0.0628829	< 0.001	< 0.001
SERPINB8	-1.06374	-0.0756341	0.0711022	< 0.001	< 0.001
SERPINF1	-1.09518	-0.378033	0.345178	< 0.001	< 0.001
SEZ6L2	-1.03434	0.0131758	-0.0127384	< 0.001	< 0.001
SFRP1	-1.05384	-0.136563	0.129586	< 0.001	< 0.001
SFRP4	-1.0383	-0.0799753	0.0770248	< 0.001	< 0.001
SHISA5	-1.06873	-0.166102	0.155421	< 0.001	< 0.001
SIGLEC1	-1.07881	-0.257611	0.238791	< 0.001	< 0.001
SIGLEC10	-1.03599	-0.21685	0.209317	< 0.001	< 0.001
SIGLEC5	-1.06804	-0.0484971	0.0454076	< 0.001	< 0.001
SIGLEC6	-1.06086	-0.106283	0.100186	< 0.001	< 0.001
SIGLEC7	-1.06759	-0.159784	0.149668	< 0.001	< 0.001
SIGLEC8	-1.06312	-0.198975	0.187162	< 0.001	< 0.001
SIRPA	-1.05798	-0.0228658	0.0216127	< 0.001	< 0.001
SIRPB1	-1.07058	-0.126815	0.118454	< 0.001	< 0.001
SLAMF1	-1.06339	-0.0734219	0.0690455	< 0.001	< 0.001
SLAMF6	-1.06897	-0.0653694	0.0611515	< 0.001	< 0.001
SLAMF7	-1.05031	-0.0824727	0.0785221	< 0.001	< 0.001
SLAMF8	-1.04996	-0.102819	0.0979265	< 0.001	< 0.001
SLITRK6	-1.06251	0.0423568	-0.0398649	< 0.001	< 0.001
SLURP1	-1.07181	-0.0119662	0.0111644	< 0.001	< 0.001
SMOC1	-1.07126	-0.231467	0.21607	< 0.001	< 0.001
SMOC2	-1.06614	-0.176648	0.165689	< 0.001	< 0.001
SMPD1	-1.05925	-0.0634823	0.0599316	< 0.001	< 0.001
SNCG	-1.08667	-0.253581	0.233356	< 0.001	< 0.001
SNRPB2	-1.06383	-0.0488953	0.0459614	< 0.001	< 0.001
SORBS1	-1.06794	-0.0739904	0.069283	< 0.001	< 0.001
SORCS2	-1.05268	-0.0501283	0.0476198	< 0.001	< 0.001
SPINK1	-1.04297	-0.0551357	0.0528643	< 0.001	< 0.001
SPINK2	-1.05883	-0.0365708	0.0345387	< 0.001	< 0.001
SPINK4	-1.08489	-0.0413491	0.0381135	< 0.001	< 0.001
SPINK5	-1.04279	0.0386786	-0.0370913	< 0.001	< 0.001
SPINK6	-1.09282	-0.0438345	0.0401112	< 0.001	< 0.001
SPINT1	-1.01284	-0.106946	0.10559	< 0.001	< 0.001
SPINT2	-1.05509	-0.0716784	0.0679356	< 0.001	< 0.001
SPOCK1	-1.08056	0.018074	-0.0167265	< 0.001	< 0.001
SPON1	-1.03124	-0.124809	0.121028	< 0.001	< 0.001
SPON2	-0.989763	-0.336948	0.340433	< 0.001	< 0.001
SPRR3	-1.06141	-0.0139238	0.0131182	< 0.001	< 0.001
SSC5D	-1.08115	-0.112946	0.104468	< 0.001	< 0.001
ST6GAL1	-1.08503	-0.198916	0.183328	< 0.001	< 0.001
STAB2	-1.09844	-0.206564	0.188053	< 0.001	< 0.001
STC1	-1.06581	-0.15965	0.149792	< 0.001	< 0.001
STC2	-1.04776	-0.0942328	0.0899371	< 0.001	< 0.001
SULT2A1	-1.04025	-0.184529	0.177389	< 0.001	< 0.001
SUSD2	-1.05495	0.0163138	-0.015464	< 0.001	< 0.001
SWAP70	-1.06626	-0.056871	0.053337	< 0.001	< 0.001
TACSTD2	-1.04791	0.0352644	-0.0336522	< 0.001	< 0.001
TAFA5	-1.05694	-0.0913181	0.0863989	< 0.001	< 0.001
TCN2	-1.08198	-0.0817573	0.0755624	< 0.001	< 0.001
TCOF1	-1.06499	-0.0965832	0.090689	< 0.001	< 0.001
TCTN3	-1.07059	-0.177352	0.165659	< 0.001	< 0.001
TFF1	-1.05368	-0.035363	0.0335614	< 0.001	< 0.001
TFF2	-1.04831	-0.054434	0.0519253	< 0.001	< 0.001
TFF3	-1.10128	-0.0647221	0.0587699	< 0.001	< 0.001
TFPI2	-1.05147	-0.0775294	0.0737343	< 0.001	< 0.001
TFRC	-1.07866	-0.0453531	0.0420457	< 0.001	< 0.001
TGFA	-1.09306	-0.24141	0.220857	< 0.001	< 0.001
TGFB1	-1.06234	-0.145788	0.137232	< 0.001	< 0.001
TGFBR2	-1.04088	-0.231998	0.222886	< 0.001	< 0.001
TGFBR3	-1.05172	0.0591366	-0.0562287	< 0.001	< 0.001
TGOLN2	-1.04223	-0.0345799	0.0331787	< 0.001	< 0.001
THBD	-1.05847	-0.0887623	0.0838587	< 0.001	< 0.001
THBS2	-0.906558	-0.3131	0.345372	< 0.001	< 0.001
THBS4	-1.05707	-0.123782	0.117099	< 0.001	< 0.001
THY1	-1.04546	-0.179483	0.171678	< 0.001	< 0.001
TIGIT	-1.05545	-0.0224699	0.0212894	< 0.001	< 0.001
TIMD4	-1.0648	-0.0590363	0.0554435	< 0.001	< 0.001
TIMP1	-1.02422	-0.313655	0.306237	< 0.001	< 0.001
TIMP2	-1.06382	-0.0150958	0.0141902	< 0.001	< 0.001
TINAGL1	-1.0731	-0.0824394	0.0768239	< 0.001	< 0.001
TNF	-1.07006	-0.125247	0.117047	< 0.001	< 0.001
TNFRSF10A	-1.10512	-0.289928	0.262349	< 0.001	< 0.001
TNFRSF10B	-1.09495	-0.105267	0.0961392	< 0.001	< 0.001
TNFRSF11A	-1.04448	-0.350731	0.335794	< 0.001	< 0.001
TNFRSF11B	-1.0096	-0.236711	0.234461	< 0.001	< 0.001
TNFRSF12A	-1.05721	-0.353098	0.333991	< 0.001	< 0.001
TNFRSF13B	-1.03833	-0.112991	0.10882	< 0.001	< 0.001
TNFRSF13C	-1.07152	-0.0394611	0.0368271	< 0.001	< 0.001
TNFRSF14	-1.06246	-0.237468	0.223509	< 0.001	< 0.001
TNFRSF17	-1.04227	-0.0424578	0.0407359	< 0.001	< 0.001
TNFRSF1A	-1.06758	-0.503494	0.471622	< 0.001	< 0.001
TNFRSF1B	-1.02496	-0.18745	0.182885	< 0.001	< 0.001
TNFRSF21	-1.04574	-0.0632897	0.0605215	< 0.001	< 0.001
TNFRSF4	-1.03318	-0.167989	0.162593	< 0.001	< 0.001
TNFRSF6B	-1.09969	-0.329837	0.299937	< 0.001	< 0.001
TNFRSF8	-1.05596	-0.0481279	0.0455775	< 0.001	< 0.001
TNFRSF9	-1.05139	-0.12067	0.114773	< 0.001	< 0.001
TNFSF12	-1.05602	-0.0240538	0.0227779	< 0.001	< 0.001
TNFSF13	-1.04823	-0.0537976	0.0513222	< 0.001	< 0.001
TNFSF8	-1.05062	-0.0668938	0.0636705	< 0.001	< 0.001
TPP1	-1.06458	-0.120909	0.113575	< 0.001	< 0.001
TPSAB1	-1.06401	-0.0136849	0.0128617	< 0.001	< 0.001
TREM2	-1.05746	-0.165309	0.156326	< 0.001	< 0.001
TXNDC15	-1.06387	-0.0746541	0.0701724	< 0.001	< 0.001
TXNDC5	-1.07026	-0.0555684	0.0519204	< 0.001	< 0.001
ULBP2	-1.01514	-0.137161	0.135116	< 0.001	< 0.001
UMOD	-1.08878	-0.13891	0.127583	< 0.001	< 0.001
USP28	-1.05837	-0.0346314	0.0327214	< 0.001	< 0.001
UXS1	-1.05426	-0.0186623	0.0177019	< 0.001	< 0.001
VCAM1	-1.02429	-0.060111	0.0586858	< 0.001	< 0.001
VEGFA	-1.07987	-0.132907	0.123077	< 0.001	< 0.001
VEGFB	-1.05636	-0.10543	0.0998053	< 0.001	< 0.001
VEGFD	-1.04523	0.0459074	-0.043921	< 0.001	< 0.001
VIT	-1.0718	-0.0581151	0.0542221	< 0.001	< 0.001
VMO1	-1.07268	-0.120048	0.111914	< 0.001	< 0.001
VNN2	-1.06542	-0.0544882	0.0511424	< 0.001	< 0.001
VSIG2	-1.06004	-0.0407462	0.0384385	< 0.001	< 0.001
VSIG4	-1.06583	-0.41733	0.391553	< 0.001	< 0.001
VSTM1	-1.0704	-0.0264679	0.024727	< 0.001	< 0.001
VWA1	-1.08045	-0.191045	0.176819	< 0.001	< 0.001
VWC2	-1.07583	-0.100365	0.0932912	< 0.001	< 0.001
VWF	-1.05793	-0.0514201	0.0486044	< 0.001	< 0.001
WFDC12	-1.0776	-0.0382886	0.0355314	< 0.001	< 0.001
WFDC2	-0.94766	-0.0835073	0.0881194	< 0.001	< 0.001
WNT9A	-1.05678	0.0423359	-0.0400613	< 0.001	< 0.001
XCL1	-1.05812	-0.0693403	0.0655317	< 0.001	< 0.001
XG	-1.06739	-0.0802772	0.075209	< 0.001	< 0.001
XPNPEP2	-1.06181	0.036645	-0.0345118	< 0.001	< 0.001
YAP1	-1.07193	-0.415342	0.38747	< 0.001	< 0.001
ZBTB17	-1.05929	-0.0604154	0.0570338	< 0.001	< 0.001
ACTN4	-1.05338	-0.00802944	0.00762258	0.004	0.0151417
ADAM15	-1.05667	-0.017377	0.016445	0.004	0.0151417
ADAMTS8	-1.07339	-0.0293957	0.0273857	0.004	0.0151417
AGRP	-1.06567	-0.0719894	0.0675534	0.004	0.0151417
AIF1L	-1.05551	-0.0143573	0.0136023	0.004	0.0151417
AMIGO2	-1.04175	-0.0536521	0.051502	0.004	0.0151417
APBB1IP	-1.06625	-0.0849303	0.0796529	0.004	0.0151417
ART3	-1.04378	0.0843101	-0.080774	0.004	0.0151417
ASAH1	-1.06413	-0.0544672	0.0511849	0.004	0.0151417
BAG3	-1.06573	-0.0482534	0.0452774	0.004	0.0151417
C5	-1.07651	-0.0441454	0.0410077	0.004	0.0151417
CAPG	-1.06282	-0.0451391	0.0424711	0.004	0.0151417
CCL11	-1.05666	-0.00930813	0.00880902	0.004	0.0151417
CCL19	-1.06183	-0.0418695	0.0394316	0.004	0.0151417
CD1C	-1.07552	-0.00847288	0.00787796	0.004	0.0151417
CDHR1	-1.05704	-0.0216785	0.0205087	0.004	0.0151417
CDSN	-1.07445	0.0164745	-0.015333	0.004	0.0151417
CES2	-1.07279	-0.0907972	0.0846367	0.004	0.0151417
CFHR2	-1.07177	-0.0282992	0.0264042	0.004	0.0151417
CLEC12A	-1.06096	-0.0220206	0.0207554	0.004	0.0151417
CNTN5	-1.07048	-0.043417	0.0405584	0.004	0.0151417
CRH	-1.06826	-0.0374187	0.0350275	0.004	0.0151417
CSF2	-1.06277	-0.0323508	0.0304402	0.004	0.0151417
CSRP3	-1.06751	-0.0124282	0.0116423	0.004	0.0151417
CXCL8	-1.05392	-0.0436672	0.041433	0.004	0.0151417
DHPS	-1.0556	-0.0531962	0.0503941	0.004	0.0151417
DNAJB8	-1.06519	0.00977344	-0.00917527	0.004	0.0151417
DUSP29	-1.06283	-0.0131251	0.0123492	0.004	0.0151417
ERBB3	-1.0499	0.0809804	-0.0771317	0.004	0.0151417
FAM3D	-1.05848	-0.00752916	0.00711315	0.004	0.0151417
FASLG	-1.07738	-0.0183973	0.0170759	0.004	0.0151417
FGF5	-1.06063	0.0242294	-0.0228444	0.004	0.0151417
GCG	-1.07711	-0.0653773	0.060697	0.004	0.0151417
GIMAP8	-1.05757	-0.0424704	0.0401585	0.004	0.0151417
GLA	-1.06	-0.131811	0.12435	0.004	0.0151417
GRPEL1	-1.06387	-0.160559	0.150919	0.004	0.0151417
IFNL1	-1.06813	-0.0303995	0.0284604	0.004	0.0151417
ISM1	-1.05785	-0.0816025	0.0771402	0.004	0.0151417
ITGA11	-1.06611	-0.0964438	0.0904632	0.004	0.0151417
LYVE1	-1.06135	-0.014757	0.013904	0.004	0.0151417
MCAM	-1.05545	0.0184012	-0.0174346	0.004	0.0151417
MSLN	-1.05834	-0.0105833	0.00999994	0.004	0.0151417
MVK	-1.05531	-0.131065	0.124196	0.004	0.0151417
OMD	-1.07003	-0.0448199	0.0418866	0.004	0.0151417
OXT	-1.06882	-0.149688	0.14005	0.004	0.0151417
P4HB	-1.07311	-0.0833005	0.0776255	0.004	0.0151417
PCDH7	-1.05986	-0.00514246	0.00485201	0.004	0.0151417
PYDC1	-1.06596	-0.00550379	0.00516323	0.004	0.0151417
SERPINA3	-1.08753	-0.0475075	0.043684	0.004	0.0151417
SFTPA2	-1.0557	-0.0160685	0.0152207	0.004	0.0151417
SLC39A5	-1.07484	-0.0672633	0.0625799	0.004	0.0151417
SLITRK2	-1.06566	-0.0474102	0.0444891	0.004	0.0151417
SSH3	-1.06463	0.00827323	-0.00777097	0.004	0.0151417
STX4	-1.05893	-0.0365269	0.0344942	0.004	0.0151417
STX8	-1.06157	-0.0372433	0.0350832	0.004	0.0151417
SUSD5	-1.05289	0.0432822	-0.0411079	0.004	0.0151417
TMPRSS11D	-1.05717	-0.0119523	0.011306	0.004	0.0151417
TNFSF10	-1.06045	0.0409866	-0.0386503	0.004	0.0151417
TPMT	-1.0594	0.021415	-0.0202142	0.004	0.0151417
TPR	-1.0573	-0.0459836	0.0434916	0.004	0.0151417
WFIKKN1	-1.06566	0.0191228	-0.0179445	0.004	0.0151417
ACP5	-1.0793	-0.0962688	0.0891959	0.008	0.0289652
ADAMTS4	-1.06576	-0.0422538	0.0396468	0.008	0.0289652
ADGRE1	-1.04407	-0.0777097	0.0744294	0.008	0.0289652
APOH	-1.07561	-0.00701085	0.00651802	0.008	0.0289652
ARHGEF5	-1.06698	-0.012082	0.0113235	0.008	0.0289652
ASS1	-1.05974	0.119569	-0.112828	0.008	0.0289652
BAP18	-1.06248	-0.0622808	0.0586182	0.008	0.0289652
BMP4	-1.04351	0.00679306	-0.00650979	0.008	0.0289652
C3	-1.07342	-0.0819722	0.0763653	0.008	0.0289652
CBLIF	-1.05118	-0.00880742	0.00837862	0.008	0.0289652
CCL18	-1.07307	-0.068928	0.0642345	0.008	0.0289652
CD33	-1.06042	-0.0158809	0.014976	0.008	0.0289652
CFB	-1.09077	-0.158574	0.145379	0.008	0.0289652
CFP	-1.04112	0.0801089	-0.0769446	0.008	0.0289652
CSF2RA	-1.05534	-0.0328667	0.0311433	0.008	0.0289652
DPP7	-1.05855	-0.0487895	0.0460911	0.008	0.0289652
FAP	-1.05997	0.0326931	-0.0308435	0.008	0.0289652
FLT1	-1.04549	-0.0152115	0.0145496	0.008	0.0289652
IFNGR2	-1.06506	-0.0685218	0.0643362	0.008	0.0289652
IGFBP3	-1.03547	-0.0145473	0.014049	0.008	0.0289652
IL16	-1.07378	-0.0994678	0.0926335	0.008	0.0289652
IL3RA	-1.06252	-0.0135676	0.0127692	0.008	0.0289652
ITGB7	-1.06248	-0.0188948	0.0177837	0.008	0.0289652
KLF4	-1.06361	-0.0401797	0.0377766	0.008	0.0289652
LGMN	-1.0643	-0.0726604	0.0682706	0.008	0.0289652
MCEE	-1.06169	-0.007384	0.00695497	0.008	0.0289652
MDGA1	-1.05059	-0.00601918	0.00572934	0.008	0.0289652
MENT	-1.05846	-0.0608655	0.0575041	0.008	0.0289652
PRTG	-1.04757	-0.012571	0.0120002	0.008	0.0289652
REG1A	-1.06343	0.0171729	-0.0161486	0.008	0.0289652
SCG2	-1.0555	0.0133005	-0.0126012	0.008	0.0289652
SERPINE2	-1.05905	0.0473701	-0.044729	0.008	0.0289652
SFTPD	-1.05336	-0.00691979	0.00656924	0.008	0.0289652
SOX9	-1.06269	-0.0111585	0.0105003	0.008	0.0289652
SPESP1	-1.0653	-0.0130001	0.0122033	0.008	0.0289652
AARSD1	-1.06233	-0.0155243	0.0146135	0.012	0.0415363
B3GAT3	-1.0648	-0.00386988	0.00363437	0.012	0.0415363
CCL22	-1.06799	-0.0768177	0.0719276	0.012	0.0415363
CD200	-1.05048	0.0327094	-0.0311377	0.012	0.0415363
CEACAM20	-1.05761	-0.0186444	0.0176289	0.012	0.0415363
CPA4	-1.04527	-0.0123941	0.0118573	0.012	0.0415363
CSF3R	-1.05643	-0.046608	0.0441186	0.012	0.0415363
CTSB	-1.04478	0.0239011	-0.0228767	0.012	0.0415363
CTSC	-1.06807	-0.0455119	0.0426115	0.012	0.0415363
FLT3LG	-1.06463	-0.0330816	0.0310734	0.012	0.0415363
FNDC1	-1.06687	-0.0453856	0.0425409	0.012	0.0415363
GFAP	-1.07081	0.00799792	-0.00746905	0.012	0.0415363
GH1	-1.05937	0.0568179	-0.0536337	0.012	0.0415363
GNAS	-1.07292	0.0139569	-0.0130084	0.012	0.0415363
GSN	-1.06612	-0.0293038	0.0274863	0.012	0.0415363
ITGB6	-1.04417	0.00756374	-0.00724378	0.012	0.0415363
LAYN	-1.02149	0.0227374	-0.0222591	0.012	0.0415363
LBR	-1.06579	-0.0531628	0.0498813	0.012	0.0415363
LMNB1	-1.06294	-0.0327909	0.0308491	0.012	0.0415363
LRTM2	-1.08075	-0.0529366	0.0489815	0.012	0.0415363
MYOM2	-1.05437	-0.011928	0.0113129	0.012	0.0415363
NAAA	-1.0625	-0.00668243	0.00628932	0.012	0.0415363
NDUFS6	-1.07085	-0.037067	0.0346144	0.012	0.0415363
PDIA3	-1.06153	-0.0352013	0.0331609	0.012	0.0415363
PGD	-1.0651	-0.0352546	0.0330998	0.012	0.0415363
PRELP	-1.03365	-0.0079467	0.00768799	0.012	0.0415363
PRKD2	-1.06535	0.011656	-0.010941	0.012	0.0415363
PROC	-1.04265	0.0540857	-0.0518734	0.012	0.0415363
PRR4	-1.05362	0.00728147	-0.00691094	0.012	0.0415363
SLMAP	-1.06298	-0.0288194	0.0271119	0.012	0.0415363
SMTN	-1.05733	-0.0185169	0.0175129	0.012	0.0415363
SYT1	-1.06362	0.0134596	-0.0126545	0.012	0.0415363
TMSB10	-1.06974	-0.0542564	0.0507191	0.012	0.0415363
TNFRSF10C	-1.05993	-0.023149	0.0218401	0.012	0.0415363
TREML2	-1.06337	-0.0398423	0.0374679	0.012	0.0415363
TSHB	-1.06875	0.0149071	-0.0139481	0.012	0.0415363
WFDC1	-1.06298	-0.0140776	0.0132435	0.012	0.0415363
AKR1B10	-1.04365	-0.0373045	0.0357443	0.016	0.0541581
CD164	-1.06387	-0.0278773	0.0262036	0.016	0.0541581
CD58	-1.05091	0.0122844	-0.0116893	0.016	0.0541581
CLEC4G	-1.07362	-0.0590648	0.0550144	0.016	0.0541581
CRNN	-1.06295	0.00551586	-0.00518922	0.016	0.0541581
EBI3_IL27	-1.03721	-0.0108891	0.0104984	0.016	0.0541581
EGLN1	-1.05484	-0.0656452	0.0622326	0.016	0.0541581
ENTR1	-1.05112	-0.0820653	0.0780746	0.016	0.0541581
FCRL1	-1.06177	-0.0437922	0.0412447	0.016	0.0541581
HSD17B14	-1.06428	-0.0559407	0.052562	0.016	0.0541581
JAM3	-1.06281	-0.0345302	0.0324895	0.016	0.0541581
KLK15	-1.05945	-0.00670417	0.00632794	0.016	0.0541581
LUZP2	-1.05484	0.00832943	-0.0078964	0.016	0.0541581
MATN3	-1.05346	0.0206054	-0.0195597	0.016	0.0541581
MET	-1.06403	-0.0363814	0.0341921	0.016	0.0541581
PCDH1	-1.05889	-0.0145354	0.013727	0.016	0.0541581
RRM2	-1.06882	-0.0655945	0.0613708	0.016	0.0541581
SPP1	-1.05885	0.00781175	-0.0073776	0.016	0.0541581
VSTM2L	-1.0663	-0.0344187	0.0322786	0.016	0.0541581
ACY3	-1.0626	-0.0801025	0.0753836	0.02	0.0657853
ARHGAP1	-1.0611	0.00678765	-0.00639679	0.02	0.0657853
C1QTNF6	-1.05889	-0.0205904	0.0194452	0.02	0.0657853
CST6	-1.0499	0.0219109	-0.0208696	0.02	0.0657853
DSG3	-1.05943	0.00594852	-0.00561483	0.02	0.0657853
ECM1	-1.06186	-0.0133409	0.0125637	0.02	0.0657853
ENAH	-1.07189	-0.0609771	0.0568876	0.02	0.0657853
FBN2	-1.06642	-0.00565832	0.00530589	0.02	0.0657853
GHR	-1.04594	0.112901	-0.107942	0.02	0.0657853
GIGYF2	-1.06453	-0.0322728	0.0303165	0.02	0.0657853
HNRNPUL1	-1.06513	-0.0467526	0.0438938	0.02	0.0657853
LSP1	-1.0587	-0.0588665	0.0556024	0.02	0.0657853
NCAM1	-1.06265	-0.0279008	0.0262559	0.02	0.0657853
NTF3	-1.06443	0.00511684	-0.00480713	0.02	0.0657853
PCDH9	-1.05767	-0.0453949	0.0429198	0.02	0.0657853
PDGFRB	-1.05993	-0.0136125	0.0128428	0.02	0.0657853
PECAM1	-1.06331	-0.0396247	0.0372654	0.02	0.0657853
PRSS53	-1.06459	0.0107096	-0.0100598	0.02	0.0657853
PXDNL	-1.06275	-0.00532233	0.00500806	0.02	0.0657853
PXN	-1.05694	-0.0509871	0.0482405	0.02	0.0657853
REG1B	-1.05213	-0.0112041	0.010649	0.02	0.0657853
REG3A	-1.04358	0.0140803	-0.0134923	0.02	0.0657853
S100A4	-1.06572	0.0326789	-0.0306638	0.02	0.0657853
SLC12A2	-1.06882	0.00530778	-0.00496601	0.02	0.0657853
SNAPIN	-1.06277	0.0330737	-0.0311204	0.02	0.0657853
BCL2L11	-1.05949	-0.0160677	0.0151654	0.024	0.0777996
CHGA	-1.0373	0.00955992	-0.00921615	0.024	0.0777996
CKMT1A_CKMT1B	-1.06988	-0.00435445	0.00407003	0.024	0.0777996
EPPK1	-1.06645	-0.0234177	0.0219586	0.024	0.0777996
HPGDS	-1.06153	0.00860279	-0.00810417	0.024	0.0777996
IL6R	-1.06318	-0.0194811	0.0183234	0.024	0.0777996
JCHAIN	-1.05551	-0.00481127	0.00455824	0.024	0.0777996
MAN1A2	-1.06126	-0.051375	0.0484096	0.024	0.0777996
MYL4	-1.05955	-0.0144188	0.0136085	0.024	0.0777996
NOTCH1	-1.05593	-0.0230686	0.0218468	0.024	0.0777996
OGFR	-1.06269	-0.0377237	0.0354982	0.024	0.0777996
PCDH12	-1.05968	-0.00577551	0.00545026	0.024	0.0777996
PTPRB	-1.05958	-0.0736975	0.0695537	0.024	0.0777996
ARSA	-1.06645	-0.0676406	0.063426	0.028	0.0885957
BNIP3L	-1.05793	-0.0314563	0.0297338	0.028	0.0885957
C9	-1.06553	0.0165951	-0.0155744	0.028	0.0885957
CDH17	-1.06707	-0.00491543	0.00460647	0.028	0.0885957
CEACAM5	-1.05652	-0.0169096	0.016005	0.028	0.0885957
COL9A1	-1.05301	0.00558654	-0.0053053	0.028	0.0885957
EGFR	-1.04617	0.00885189	-0.00846123	0.028	0.0885957
GNLY	-1.0585	-0.0277065	0.0261752	0.028	0.0885957
KCTD5	-1.06016	-0.0721556	0.0680613	0.028	0.0885957
MMP15	-1.07041	-0.00374017	0.00349414	0.028	0.0885957
PLXDC2	-1.05371	-0.00480403	0.00455918	0.028	0.0885957
PODXL2	-1.0607	0.0245994	-0.0231918	0.028	0.0885957
PTPRS	-1.05345	0.0273186	-0.0259326	0.028	0.0885957
SAT2	-1.06047	-0.0317863	0.0299738	0.028	0.0885957
SCRIB	-1.05748	-0.0308126	0.0291379	0.028	0.0885957
SERPINA4	-1.05707	0.032072	-0.0303404	0.028	0.0885957
SERPINC1	-1.0522	-0.018546	0.017626	0.028	0.0885957
SGSH	-1.0545	-0.0537525	0.0509744	0.028	0.0885957
TALDO1	-1.0662	-0.0510941	0.0479216	0.028	0.0885957
TEK	-1.05598	-0.0369405	0.0349821	0.028	0.0885957
TNFSF13B	-1.05417	-0.0589772	0.0559468	0.028	0.0885957
UBE2L6	-1.06564	-0.040335	0.0378503	0.028	0.0885957
ALPP	-1.05933	-0.0131071	0.012373	0.032	0.0995214
BCL7B	-1.06422	0.00546606	-0.00513619	0.032	0.0995214
C1QL2	-1.0624	0.00778168	-0.00732462	0.032	0.0995214
CRISP2	-1.06934	-0.0206838	0.0193426	0.032	0.0995214
EIF4EBP1	-1.06141	-0.0363864	0.0342812	0.032	0.0995214
FCRL3	-1.06269	-0.0214618	0.0201957	0.032	0.0995214
GPKOW	-1.0613	-0.0478584	0.0450941	0.032	0.0995214
H2AP	-1.06228	0.00470755	-0.00443157	0.032	0.0995214
KLK13	-1.06063	-0.0059492	0.0056091	0.032	0.0995214
PTS	-1.04926	-0.112972	0.107669	0.032	0.0995214
S100A12	-1.06465	-0.0317572	0.0298288	0.032	0.0995214
SCN2A	-1.06071	0.00636488	-0.00600056	0.032	0.0995214
SIGLEC9	-1.05812	-0.0302266	0.0285663	0.032	0.0995214
SLIT2	-1.06117	-0.0300996	0.0283645	0.032	0.0995214
SPARCL1	-1.05781	0.0116413	-0.011005	0.032	0.0995214
ZNRD2	-1.06259	-0.0386066	0.0363325	0.032	0.0995214
ACAA1	-1.05857	-0.111022	0.104879	0.036	0.110544
ARID3A	-1.06169	-0.00380371	0.00358269	0.036	0.110544
BOLA1	-1.06008	-0.0219226	0.0206802	0.036	0.110544
FAM3B	-1.07423	-0.0105971	0.00986488	0.036	0.110544
GBP1	-1.06901	-0.0798861	0.0747292	0.036	0.110544
LILRB5	-1.06912	-0.0161414	0.0150977	0.036	0.110544
MRI1	-1.05594	0.0273833	-0.0259326	0.036	0.110544
NTRK3	-1.0701	-0.0388913	0.0363436	0.036	0.110544
PCBD1	-1.05943	-0.156179	0.147418	0.036	0.110544
RANGAP1	-1.0631	-0.00479631	0.00451165	0.036	0.110544
RGMA	-1.03848	0.0315942	-0.0304234	0.036	0.110544
TCL1A	-1.05697	0.0292991	-0.02772	0.036	0.110544
APOA4	-1.08447	0.0101093	-0.00932189	0.04	0.121292
CRTAC1	-1.06026	-0.0110687	0.0104396	0.04	0.121292
FCN1	-1.07261	-0.0562671	0.0524581	0.04	0.121292
ITGAL	-1.06732	-0.0378147	0.0354296	0.04	0.121292
LYPD8	-1.06324	-0.0189622	0.0178343	0.04	0.121292
MAP2	-1.06325	-0.0274014	0.0257714	0.04	0.121292
NCR3LG1	-1.01724	-0.0162626	0.0159871	0.04	0.121292
SAFB2	-1.06452	-0.0138043	0.0129676	0.04	0.121292
SATB1	-1.06278	-0.00952046	0.00895807	0.04	0.121292
SEMA4C	-1.06825	-0.0130958	0.0122591	0.04	0.121292
SOST	-1.05942	-0.0360878	0.0340637	0.04	0.121292
VCAN	-1.05655	0.0117379	-0.0111096	0.04	0.121292
ADAMTSL4	-1.05748	-0.0191257	0.0180861	0.044	0.131638
ANXA10	-1.06395	-0.00978945	0.00920106	0.044	0.131638
BAMBI	-1.07224	-0.00589518	0.00549802	0.044	0.131638
CWC15	-1.06181	-0.0253931	0.0239149	0.044	0.131638
KLK10	-1.04826	-0.0142406	0.0135849	0.044	0.131638
MMP1	-1.06534	-0.0271369	0.0254725	0.044	0.131638
OBP2B	-1.05064	0.0244171	-0.0232401	0.044	0.131638
PI16	-1.06092	0.0220779	-0.0208102	0.044	0.131638
RFC4	-1.06599	-0.0209286	0.019633	0.044	0.131638
RNASE3	-1.05281	-0.028144	0.0267324	0.044	0.131638
SNED1	-1.05434	-0.0126685	0.0120156	0.044	0.131638
TPM3	-1.05982	-0.0044441	0.00419326	0.044	0.131638
TTR	-1.04701	0.00592116	-0.00565531	0.044	0.131638
ACY1	-1.06435	-0.152352	0.143142	0.048	0.140855
APOA1	-1.06017	-0.0243036	0.0229242	0.048	0.140855
CD3D	-1.06724	0.00401253	-0.00375972	0.048	0.140855
DBI	-1.06525	-0.0364778	0.0342435	0.048	0.140855
DOCK9	-1.05892	-0.00399022	0.00376819	0.048	0.140855
EXOSC10	-1.06498	0.00361269	-0.00339226	0.048	0.140855
FABP9	-1.06504	-0.0116834	0.0109699	0.048	0.140855
FGR	-1.05916	-0.0265626	0.0250788	0.048	0.140855
ICAM5	-1.05003	-0.00523131	0.00498206	0.048	0.140855
IL13RA2	-1.067	0.00583418	-0.00546782	0.048	0.140855
MYLPF	-1.05794	-0.0140381	0.0132693	0.048	0.140855
PLAT	-1.06871	-0.105779	0.0989788	0.048	0.140855
PPP1R14D	-1.06575	-0.00624466	0.00585939	0.048	0.140855
RPS10	-1.06694	0.00929668	-0.00871337	0.048	0.140855
SERPIND1	-1.07809	-0.0797793	0.0740006	0.048	0.140855
SERPINI1	-1.06209	0.0252139	-0.0237398	0.048	0.140855
SIAE	-1.06648	-0.0542452	0.0508636	0.048	0.140855
TIE1	-1.06047	-0.0199331	0.0187965	0.048	0.140855
TMPRSS5	-1.06798	-0.0339626	0.0318008	0.048	0.140855
AHSG	-1.06312	-0.0368385	0.0346514	0.052	0.150022
APOD	-1.0705	-0.0546075	0.0510114	0.052	0.150022
CD2	-1.06574	-0.010207	0.00957737	0.052	0.150022
CD244	-1.0582	-0.0319625	0.0302045	0.052	0.150022
CTRC	-1.06108	-0.00896391	0.00844794	0.052	0.150022
EZR	-1.07036	-0.0632405	0.0590836	0.052	0.150022
FKBP4	-1.06416	-0.0352454	0.0331203	0.052	0.150022
GIP	-1.06109	-0.00791381	0.00745819	0.052	0.150022
GNPDA2	-1.06045	0.0260745	-0.0245882	0.052	0.150022
ICAM4	-1.06941	-0.0141965	0.0132751	0.052	0.150022
IDUA	-1.06043	-0.0515646	0.0486262	0.052	0.150022
LACRT	-1.0696	-0.0121592	0.011368	0.052	0.150022
NADK	-1.06073	-0.0462066	0.0435611	0.052	0.150022
S100A13	-1.06277	-0.018479	0.0173876	0.052	0.150022
SCARB1	-1.0599	0.0110654	-0.01044	0.052	0.150022
TP53I3	-1.06088	-0.0468188	0.044132	0.052	0.150022
TRIAP1	-1.06622	-0.0341045	0.0319863	0.052	0.150022
C1QBP	-1.06476	-0.00649209	0.00609723	0.056	0.159663
CLEC4A	-1.06483	-0.0262295	0.0246325	0.056	0.159663
CORO6	-1.05983	-0.00605697	0.00571502	0.056	0.159663
CXCL17	-1.05729	-0.0228341	0.0215969	0.056	0.159663
ENG	-1.04392	-0.0059401	0.00569016	0.056	0.159663
FDX2	-1.0643	-0.0190671	0.0179153	0.056	0.159663
GGH	-1.06808	-0.0702499	0.0657719	0.056	0.159663
HBQ1	-1.06835	-0.00803617	0.00752202	0.056	0.159663
KAZALD1	-1.04373	0.00494047	-0.00473347	0.056	0.159663
KIR2DL2	-1.05966	-0.00530826	0.00500938	0.056	0.159663
MAMDC4	-1.0692	-0.0568505	0.0531713	0.056	0.159663
SIRT1	-1.0674	0.0054028	-0.00506164	0.056	0.159663
BGLAP	-1.05845	0.00762635	-0.0072052	0.06	0.169573
BID	-1.05899	0.0406813	-0.0384151	0.06	0.169573
CLEC3B	-1.05594	0.00517074	-0.00489682	0.06	0.169573
GPIHBP1	-1.05805	0.00441989	-0.00417739	0.06	0.169573
NUDT5	-1.06477	-0.0370932	0.0348367	0.06	0.169573
PAG1	-1.06714	-0.0443893	0.0415965	0.06	0.169573
PLXDC1	-1.06276	-0.00987123	0.00928834	0.06	0.169573
PTPRR	-1.0615	0.0179469	-0.016907	0.06	0.169573
TNFAIP8	-1.06258	0.0109363	-0.0102921	0.06	0.169573
ADAM22	-1.03825	-0.00740704	0.00713415	0.064	0.178623
CD34	-1.06544	-0.0250682	0.0235284	0.064	0.178623
CIT	-1.05762	-0.0234252	0.0221491	0.064	0.178623
DSG4	-1.06543	-0.0204449	0.0191893	0.064	0.178623
GBP2	-1.06834	-0.0173722	0.016261	0.064	0.178623
IL17D	-1.0579	-0.00292816	0.0027679	0.064	0.178623
LRRC37A2	-1.062	-0.00401852	0.00378392	0.064	0.178623
MCFD2	-1.06291	-0.0242904	0.0228528	0.064	0.178623
MEGF11	-1.0633	-0.00323354	0.00304103	0.064	0.178623
SERPINA11	-1.06803	0.00401534	-0.00375957	0.064	0.178623
TGFBR1	-1.05543	0.00291828	-0.00276501	0.064	0.178623
THAP12	-1.06283	-0.00371543	0.00349579	0.064	0.178623
UBE2Z	-1.06373	0.0102408	-0.00962725	0.064	0.178623
BCAT1	-1.06356	-0.0330311	0.0310571	0.068	0.187273
CA5A	-1.06629	-0.0967486	0.0907338	0.068	0.187273
CD22	-1.06302	-0.0561839	0.0528531	0.068	0.187273
CHMP1A	-1.0587	0.0195012	-0.01842	0.068	0.187273
CTRB1	-1.06608	-0.00864	0.00810446	0.068	0.187273
GPRC5C	-1.05595	-0.0684361	0.0648103	0.068	0.187273
GSAP	-1.06138	0.00392824	-0.00370108	0.068	0.187273
NFKB2	-1.06203	0.00329431	-0.00310189	0.068	0.187273
NMNAT1	-1.05805	-0.032471	0.0306894	0.068	0.187273
SCGB1A1	-1.05015	0.0153659	-0.0146322	0.068	0.187273
SLC39A14	-1.0626	0.0147738	-0.0139034	0.068	0.187273
STX3	-1.06078	-0.00970786	0.00915165	0.068	0.187273
TNFSF11	-1.05429	-0.00445765	0.0042281	0.068	0.187273
TYRO3	-1.06012	-0.0255214	0.024074	0.068	0.187273
AKT3	-1.05971	0.015782	-0.0148928	0.072	0.19717
CRYGD	-1.06264	0.0114178	-0.0107448	0.072	0.19717
FBP1	-1.05984	-0.0699679	0.0660177	0.072	0.19717
KIT	-1.06887	-0.0320717	0.0300053	0.072	0.19717
SEPTIN3	-1.06488	-0.00847431	0.00795802	0.072	0.19717
SESTD1	-1.06402	0.00997067	-0.00937077	0.072	0.19717
BTD	-1.05448	0.0370958	-0.0351794	0.076	0.205419
CCL4	-1.06727	-0.0435751	0.0408284	0.076	0.205419
CPB1	-1.06479	-0.0213848	0.0200836	0.076	0.205419
ENO3	-1.06185	0.0708005	-0.0666763	0.076	0.205419
ITIH4	-1.07324	-0.0336812	0.0313827	0.076	0.205419
LILRA6	-1.06608	-0.0215675	0.0202307	0.076	0.205419
MAPK9	-1.06	-0.0286755	0.0270523	0.076	0.205419
MBL2	-1.06064	0.0112975	-0.0106516	0.076	0.205419
NPTXR	-1.06818	-0.0189656	0.017755	0.076	0.205419
POSTN	-1.05684	0.018413	-0.0174227	0.076	0.205419
PPBP	-1.06166	0.0281047	-0.0264723	0.076	0.205419
SUMF2	-1.06147	-0.0471207	0.0443918	0.076	0.205419
TDO2	-1.05899	0.0333752	-0.0315161	0.076	0.205419
TMPRSS15	-1.0673	-0.0370452	0.0347092	0.076	0.205419
ADAMTSL5	-1.05695	0.00923766	-0.00873991	0.08	0.21326
AGR3	-1.07208	-0.0449906	0.0419657	0.08	0.21326
APLP1	-1.06969	-0.0377296	0.0352715	0.08	0.21326
DNPEP	-1.06297	-0.0411637	0.0387254	0.08	0.21326
DTD1	-1.06254	0.0165358	-0.0155626	0.08	0.21326
FOLH1	-1.06692	0.0130496	-0.0122311	0.08	0.21326
GZMB	-1.06943	0.0168196	-0.0157276	0.08	0.21326
HDGFL2	-1.0638	-0.0407578	0.0383134	0.08	0.21326
LRRC38	-1.06134	-0.00910458	0.00857842	0.08	0.21326
M6PR	-1.05714	-0.0124034	0.011733	0.08	0.21326
PPP3R1	-1.06634	-0.0330723	0.0310149	0.08	0.21326
SIT1	-1.06832	-0.0360726	0.0337658	0.08	0.21326
TLR2	-1.06203	-0.00910384	0.00857214	0.08	0.21326
TNFRSF19	-1.05731	0.0141817	-0.013413	0.08	0.21326
TREH	-1.06061	-0.0372332	0.0351055	0.08	0.21326
ADA	-1.06362	-0.0323378	0.0304035	0.084	0.221489
ALPI	-1.06093	-0.00623985	0.00588146	0.084	0.221489
CALY	-1.06402	0.00292777	-0.00275161	0.084	0.221489
CCL13	-1.05895	-0.0284736	0.0268885	0.084	0.221489
CCL8	-1.06782	-0.0327987	0.0307156	0.084	0.221489
DNMBP	-1.06037	-0.0245615	0.0231632	0.084	0.221489
GKN1	-1.06101	0.00432544	-0.00407671	0.084	0.221489
GSTP1	-1.06379	-0.00416855	0.0039186	0.084	0.221489
IL17RA	-1.05846	-0.0108928	0.0102912	0.084	0.221489
MAPK13	-1.05887	-0.00849317	0.00802095	0.084	0.221489
SMNDC1	-1.06154	-0.0323909	0.0305131	0.084	0.221489
ZHX2	-1.06071	-0.0262105	0.0247103	0.084	0.221489
COQ7	-1.05368	0.0594591	-0.0564297	0.088	0.23016
DCXR	-1.06001	0.118411	-0.111708	0.088	0.23016
HMCN2	-1.05827	-0.0144403	0.0136452	0.088	0.23016
HRG	-1.06035	-0.0236275	0.0222828	0.088	0.23016
KEL	-1.05253	-0.0137799	0.0130922	0.088	0.23016
KLKB1	-1.05106	0.0310754	-0.0295657	0.088	0.23016
NPR1	-1.06236	-0.0072757	0.00684865	0.088	0.23016
TRIM58	-1.06584	-0.0196712	0.0184562	0.088	0.23016
WASL	-1.0655	-0.00308591	0.00289622	0.088	0.23016
AIFM1	-1.06621	-0.0552493	0.0518183	0.092	0.239118
CD36	-1.06521	-0.0368245	0.03457	0.092	0.239118
F2R	-1.06211	-0.0220918	0.0208	0.092	0.239118
GP5	-1.0611	0.0177802	-0.0167564	0.092	0.239118
IL13	-1.06304	0.00303101	-0.00285126	0.092	0.239118
LONP1	-1.06492	-0.034738	0.0326205	0.092	0.239118
TYMP	-1.06211	-0.0311115	0.0292922	0.092	0.239118
CCER2	-1.06174	0.00375329	-0.00353505	0.096	0.248405
DCTPP1	-1.06522	-0.0375273	0.0352296	0.096	0.248405
GABARAP	-1.06429	-0.00280115	0.00263196	0.096	0.248405
PMS1	-1.06701	-0.0134034	0.0125617	0.096	0.248405
SETMAR	-1.07166	-0.0655313	0.0611496	0.096	0.248405
ADIPOQ	-1.06116	0.0537346	-0.0506375	0.1	0.256929
COCH	-1.06162	-0.0391895	0.0369147	0.1	0.256929
ENTPD2	-1.06258	0.0490917	-0.0462005	0.1	0.256929
FOS	-1.06078	-0.0057921	0.00546022	0.1	0.256929
IL32	-1.05766	-0.00662593	0.0062647	0.1	0.256929
MYO6	-1.06271	-0.00393738	0.00370502	0.1	0.256929
NACC1	-1.06305	-0.0269426	0.0253445	0.1	0.256929
RCC1	-1.06146	-0.0198315	0.0186832	0.1	0.256929
ATP5PO	-1.05727	0.00298318	-0.00282158	0.104	0.266266
GATD3	-1.06458	-0.0311142	0.0292269	0.104	0.266266
IQGAP2	-1.05917	-0.0327476	0.0309182	0.104	0.266266
TIMP4	-1.08232	-0.00893142	0.00825211	0.104	0.266266
ABL1	-1.06431	-0.0290934	0.0273355	0.108	0.274575
ELOA	-1.05905	-0.0414924	0.0391788	0.108	0.274575
ITGA2	-1.0601	-0.00379171	0.00357676	0.108	0.274575
PAEP	-1.04103	0.00452486	-0.00434653	0.108	0.274575
PEAR1	-1.05904	-0.0035454	0.00334773	0.108	0.274575
SOD2	-1.05632	-0.0474348	0.0449057	0.108	0.274575
SPTLC1	-1.06805	-0.0182244	0.0170632	0.108	0.274575
VSIR	-1.06663	-0.0280618	0.0263088	0.108	0.274575
C1QA	-1.04865	-0.00608207	0.00579988	0.112	0.282523
DDT	-1.06057	-0.0476634	0.0449413	0.112	0.282523
KLRC1	-1.06142	0.00244766	-0.00230602	0.112	0.282523
NAPRT	-1.06342	-0.0118677	0.01116	0.112	0.282523
NMI	-1.06546	-0.0172542	0.0161941	0.112	0.282523
PTPRM	-1.06181	-0.0282841	0.0266376	0.112	0.282523
SERPINH1	-1.06342	-0.0230657	0.0216901	0.112	0.282523
TIMP3	-1.06185	-0.031437	0.0296059	0.112	0.282523
TOR1AIP1	-1.06165	-0.0187762	0.0176859	0.112	0.282523
ANXA4	-1.06171	0.0126812	-0.0119441	0.116	0.2901
BCL2	-1.0659	-0.0204575	0.0191928	0.116	0.2901
CBX2	-1.06248	0.00319914	-0.003011	0.116	0.2901
CFHR5	-1.07262	-0.032485	0.0302857	0.116	0.2901
INPP5D	-1.05876	-0.0274863	0.0259608	0.116	0.2901
KLK6	-1.05756	0.0115256	-0.0108984	0.116	0.2901
MRPL58	-1.06184	-0.0168868	0.0159033	0.116	0.2901
NFATC1	-1.06364	0.0193724	-0.0182132	0.116	0.2901
TNFAIP8L2	-1.06079	0.0211951	-0.0199805	0.116	0.2901
VASN	-1.06801	-0.00507358	0.00475048	0.116	0.2901
EXTL1	-1.06734	-0.00573114	0.00536954	0.12	0.298564
GFRA3	-1.05455	0.0223493	-0.0211932	0.12	0.298564
GGT1	-1.06456	-0.118939	0.111726	0.12	0.298564
PAXX	-1.06159	-0.0398516	0.0375396	0.12	0.298564
PCSK7	-1.06108	0.0170836	-0.0161002	0.12	0.298564
PMM2	-1.06083	0.0139508	-0.0131509	0.12	0.298564
APOB	-1.06312	-0.00336716	0.00316725	0.124	0.306681
BEX3	-1.06543	-0.00290639	0.0027279	0.124	0.306681
C1QTNF5	-1.05643	-0.0215671	0.020415	0.124	0.306681
CA14	-1.07016	-0.0535945	0.0500808	0.124	0.306681
FETUB	-1.07252	-0.0359165	0.0334881	0.124	0.306681
GPR158	-1.05921	0.0156589	-0.0147836	0.124	0.306681
IMPA1	-1.05962	0.012888	-0.0121628	0.124	0.306681
CSF2RB	-1.05918	-0.00790246	0.00746094	0.128	0.314437
GLO1	-1.06232	-0.0210985	0.0198608	0.128	0.314437
GSTT2B	-1.06401	0.00699209	-0.00657146	0.128	0.314437
HSD11B1	-1.07618	-0.0360938	0.0335388	0.128	0.314437
POMC	-1.06373	0.0191145	-0.0179693	0.128	0.314437
PON2	-1.06186	-0.0489862	0.0461325	0.128	0.314437
SH3BGRL2	-1.0625	0.00536699	-0.00505129	0.128	0.314437
TNN	-1.05973	-0.0145882	0.013766	0.128	0.314437
ANXA2	-1.0585	-0.0330404	0.0312144	0.132	0.32263
CDH23	-1.06437	-0.0129345	0.0121523	0.132	0.32263
FOLR3	-1.06479	-0.00304903	0.00286349	0.132	0.32263
GSR	-1.06675	-0.0466257	0.0437081	0.132	0.32263
NDUFA5	-1.06289	-0.024627	0.0231698	0.132	0.32263
SDHB	-1.05944	0.0508768	-0.0480222	0.132	0.32263
ALDH1A1	-1.0529	-0.0714669	0.0678764	0.136	0.329913
ELAVL4	-1.06218	-0.00593221	0.00558491	0.136	0.329913
GTPBP2	-1.06088	0.0163047	-0.0153691	0.136	0.329913
IGDCC4	-1.07013	-0.0219003	0.0204651	0.136	0.329913
NOP56	-1.0629	0.00426178	-0.00400959	0.136	0.329913
NUDT2	-1.05929	0.00285103	-0.00269145	0.136	0.329913
PLSCR3	-1.06231	-0.0265584	0.0250006	0.136	0.329913
RGMB	-1.04287	0.00753703	-0.00722723	0.136	0.329913
SMAD5	-1.06329	-0.0405519	0.0381383	0.136	0.329913
AGT	-1.06096	-0.00328579	0.00309699	0.14	0.337368
ID4	-1.0654	0.00368799	-0.00346161	0.14	0.337368
LSM1	-1.06015	0.00271868	-0.00256442	0.14	0.337368
PDP1	-1.06146	0.0100388	-0.00945751	0.14	0.337368
PTP4A3	-1.0578	-0.0448286	0.042379	0.14	0.337368
SLC9A3R2	-1.06583	-0.0187083	0.0175528	0.14	0.337368
TLR1	-1.05512	-0.0124976	0.0118447	0.14	0.337368
TOMM20	-1.06569	-0.0337514	0.0316708	0.14	0.337368
ANXA11	-1.06298	0.014381	-0.013529	0.144	0.345292
DAG1	-1.06373	-0.0395672	0.0371967	0.144	0.345292
HAO1	-1.06006	0.0959972	-0.0905583	0.144	0.345292
HS3ST3B1	-1.06286	-0.0209102	0.0196735	0.144	0.345292
KIAA0319	-1.0544	0.0178972	-0.0169738	0.144	0.345292
NBN	-1.05647	-0.019811	0.018752	0.144	0.345292
C19ORF12	-1.05467	-0.064403	0.0610647	0.148	0.352271
CCNE1	-1.06649	0.00282016	-0.00264432	0.148	0.352271
FTCD	-1.06092	-0.0898221	0.0846647	0.148	0.352271
IL36G	-1.06118	-0.00799168	0.00753091	0.148	0.352271
LCN15	-1.06755	-0.00575991	0.00539543	0.148	0.352271
LTA4H	-1.06795	-0.00907062	0.00849352	0.148	0.352271
PTGR1	-1.06399	-0.0607937	0.0571373	0.148	0.352271
WIF1	-1.06761	-0.0139617	0.0130775	0.148	0.352271
YJU2	-1.06436	-0.0174778	0.0164209	0.148	0.352271
DUT	-1.06616	-0.0277629	0.0260401	0.152	0.359441
GC	-1.06098	0.00312345	-0.00294394	0.152	0.359441
GZMA	-1.05639	-0.0412434	0.0390417	0.152	0.359441
HEBP1	-1.05981	0.00356718	-0.00336586	0.152	0.359441
MOG	-1.05932	0.0179196	-0.0169161	0.152	0.359441
NPTN	-1.0609	0.00287075	-0.00270597	0.152	0.359441
PKN3	-1.06134	-0.012708	0.0119736	0.152	0.359441
SUOX	-1.0587	-0.0569651	0.0538068	0.152	0.359441
ATP1B2	-1.06116	0.0042082	-0.00396565	0.156	0.366814
AZU1	-1.05805	-0.0196807	0.0186009	0.156	0.366814
GPC1	-1.05618	0.00473475	-0.00448289	0.156	0.366814
MAEA	-1.06168	0.00449811	-0.00423679	0.156	0.366814
NRTN	-1.06449	-0.00987691	0.00927852	0.156	0.366814
NT5C3A	-1.0621	0.00702142	-0.00661087	0.156	0.366814
TIGAR	-1.06002	-0.0166429	0.0157005	0.156	0.366814
CYB5A	-1.06172	-0.00811348	0.00764186	0.16	0.373504
GFER	-1.0636	-0.0412498	0.0387832	0.16	0.373504
KDR	-1.05225	0.0331899	-0.0315418	0.16	0.373504
KIR2DL3	-1.06056	-0.00300223	0.0028308	0.16	0.373504
MECR	-1.06519	-0.02587	0.0242866	0.16	0.373504
MORF4L1	-1.06141	0.00199225	-0.00187699	0.16	0.373504
MTHFSD	-1.06062	0.0229691	-0.0216564	0.16	0.373504
PDAP1	-1.06115	0.0174424	-0.0164373	0.16	0.373504
RICTOR	-1.06486	-0.00237079	0.00222639	0.16	0.373504
CCL28	-1.06241	-0.00302597	0.0028482	0.164	0.379796
CD84	-1.06354	0.00906556	-0.00852393	0.164	0.379796
CEACAM16	-1.06674	-0.0111786	0.0104793	0.164	0.379796
HS6ST1	-1.06272	-0.0349774	0.0329132	0.164	0.379796
ITPA	-1.06122	0.0152273	-0.0143488	0.164	0.379796
KRT5	-1.06496	-0.00886237	0.00832176	0.164	0.379796
LTBP2	-1.00151	-0.00969315	0.00967858	0.164	0.379796
MAP1LC3A	-1.06422	0.00408023	-0.00383402	0.164	0.379796
MYOM3	-1.06547	-0.00425828	0.00399661	0.164	0.379796
VPS4B	-1.06032	0.0147386	-0.0139001	0.164	0.379796
AHCY	-1.06496	-0.0212137	0.0199196	0.168	0.387826
PSME2	-1.06068	-0.0178953	0.0168716	0.168	0.387826
SERPINA6	-1.05594	0.00869667	-0.00823596	0.168	0.387826
WDR46	-1.0634	-0.0252769	0.0237699	0.168	0.387826
A1BG	-1.07476	-0.0315294	0.0293363	0.172	0.394556
BCL2L15	-1.05865	-0.013485	0.0127379	0.172	0.394556
GFOD2	-1.06298	-0.00250888	0.00236022	0.172	0.394556
KIAA1549	-1.06311	0.00342179	-0.00321865	0.172	0.394556
KLHL41	-1.0595	-0.00722115	0.00681561	0.172	0.394556
NOTCH2	-1.06044	-0.00202587	0.00191041	0.172	0.394556
PSIP1	-1.06192	-0.0283052	0.0266548	0.172	0.394556
SOD3	-1.06091	0.0088294	-0.0083225	0.172	0.394556
CCL17	-1.06414	-0.029067	0.027315	0.176	0.401832
EGFLAM	-1.0584	-0.00944302	0.008922	0.176	0.401832
HSPA1A	-1.06301	-0.0266889	0.0251068	0.176	0.401832
LHB	-1.05843	0.00252685	-0.00238736	0.176	0.401832
SCAMP3	-1.06454	-0.0258275	0.0242617	0.176	0.401832
SFTPA1	-1.06083	-0.00397496	0.00374701	0.176	0.401832
ACADSB	-1.0602	0.018446	-0.0173986	0.18	0.408084
DOK1	-1.06295	0.0119576	-0.0112495	0.18	0.408084
GFRA2	-1.05575	-0.00469375	0.00444588	0.18	0.408084
IGFBP1	-1.05622	0.0362644	-0.0343343	0.18	0.408084
IL24	-1.06298	-0.00209393	0.00196987	0.18	0.408084
PLTP	-1.05373	0.0406532	-0.0385803	0.18	0.408084
PRDX6	-1.06634	-0.0134424	0.012606	0.18	0.408084
RARRES1	-1.06114	-0.00895458	0.00843865	0.18	0.408084
SERPINA5	-1.066	-0.0299765	0.0281206	0.18	0.408084
CABP2	-1.06227	0.00469369	-0.00441856	0.184	0.414891
DCC	-1.06627	-0.00256325	0.00240395	0.184	0.414891
EEF1D	-1.06101	-0.0266962	0.0251612	0.184	0.414891
ENSA	-1.06118	0.00608674	-0.0057358	0.184	0.414891
HSDL2	-1.06378	-0.025123	0.0236168	0.184	0.414891
SELENOP	-1.05875	-0.00994994	0.00939781	0.184	0.414891
SMPD3	-1.06456	-0.00375733	0.00352946	0.184	0.414891
AOC3	-1.03951	-0.00571121	0.00549415	0.188	0.421624
CCL2	-1.056	-0.0121824	0.0115363	0.188	0.421624
CHP1	-1.06286	-0.00279898	0.00263345	0.188	0.421624
EIF4G1	-1.06105	-0.0226315	0.0213293	0.188	0.421624
GUK1	-1.06364	0.00278045	-0.0026141	0.188	0.421624
IGHMBP2	-1.06265	0.00657415	-0.00618657	0.188	0.421624
MPRIP	-1.06196	0.0181275	-0.0170699	0.188	0.421624
CD226	-1.06168	0.0140324	-0.0132172	0.192	0.426325
CXCL14	-1.06064	0.00357942	-0.00337478	0.192	0.426325
ECHS1	-1.06344	-0.0483215	0.0454387	0.192	0.426325
GALNT2	-1.05492	-0.00294589	0.00279253	0.192	0.426325
IL13RA1	-1.06603	-0.0455994	0.042775	0.192	0.426325
RPE	-1.0612	0.0111847	-0.0105396	0.192	0.426325
S100A14	-1.05806	0.00233127	-0.00220334	0.192	0.426325
SLC16A1	-1.06277	-0.0131395	0.0123635	0.192	0.426325
SRP14	-1.06025	-0.0257511	0.0242876	0.192	0.426325
SUMF1	-1.06411	0.00384086	-0.00360947	0.192	0.426325
TCN1	-1.05981	-0.0096197	0.00907679	0.192	0.426325
TDRKH	-1.06198	-0.0173533	0.0163405	0.192	0.426325
TNNI3	-1.05893	-0.00786666	0.00742886	0.192	0.426325
CDHR5	-1.05863	0.0300022	-0.0283406	0.196	0.433224
ESYT2	-1.06337	-0.0180532	0.0169773	0.196	0.433224
HBEGF	-1.05924	0.0257667	-0.0243256	0.196	0.433224
NGRN	-1.06335	-0.023546	0.0221432	0.196	0.433224
PRDX3	-1.0644	-0.0255743	0.024027	0.196	0.433224
RABEPK	-1.06055	0.00979303	-0.00923395	0.196	0.433224
ARTN	-1.06453	-0.00386916	0.00363462	0.2	0.437415
BABAM1	-1.06404	0.00314798	-0.00295851	0.2	0.437415
CA13	-1.06309	0.0117154	-0.0110201	0.2	0.437415
FKBP1B	-1.06084	0.0097509	-0.00919164	0.2	0.437415
GGA1	-1.06537	0.00267686	-0.00251262	0.2	0.437415
HSBP1	-1.06102	-0.0061888	0.00583286	0.2	0.437415
IL2RB	-1.05922	-0.00281163	0.00265443	0.2	0.437415
KDM3A	-1.0653	-0.00218674	0.0020527	0.2	0.437415
NPTX1	-1.06086	-0.00287608	0.00271109	0.2	0.437415
PTGES2	-1.0641	-0.0207812	0.0195294	0.2	0.437415
S100A11	-1.05954	-0.021401	0.0201984	0.2	0.437415
SLA2	-1.06094	0.0152416	-0.0143661	0.2	0.437415
SPRING1	-1.06525	0.00237652	-0.00223095	0.2	0.437415
TRIM40	-1.06319	0.00927673	-0.00872534	0.2	0.437415
BMP10	-1.05496	0.00782436	-0.00741672	0.204	0.444162
CSDE1	-1.06167	0.00901503	-0.00849135	0.204	0.444162
F7	-1.07062	-0.043295	0.0404393	0.204	0.444162
SNU13	-1.06168	0.00445777	-0.00419879	0.204	0.444162
TNC	-1.06524	0.00544393	-0.00511053	0.204	0.444162
TREML1	-1.06054	0.0119779	-0.0112941	0.204	0.444162
ANGPT1	-1.0623	0.0182347	-0.0171653	0.208	0.448842
BAX	-1.06401	-0.0197239	0.0185372	0.208	0.448842
CD109	-1.06104	-0.0117293	0.0110545	0.208	0.448842
CD5L	-1.05663	-0.0113739	0.0107643	0.208	0.448842
CHMP6	-1.05921	0.0265339	-0.0250507	0.208	0.448842
IGF2BP3	-1.06146	0.00318296	-0.00299867	0.208	0.448842
KIRREL1	-1.06376	-0.00212374	0.00199644	0.208	0.448842
MORN4	-1.06006	0.00293941	-0.00277286	0.208	0.448842
NEDD4L	-1.06661	0.0107361	-0.0100656	0.208	0.448842
PTH	-1.06273	-0.0346506	0.0326053	0.208	0.448842
SUSD1	-1.06206	0.0160024	-0.0150673	0.208	0.448842
TIMM8A	-1.06332	0.00650584	-0.00611843	0.208	0.448842
BDNF	-1.06191	0.0149733	-0.0141003	0.212	0.454777
LY75	-1.05782	-0.0106878	0.0101037	0.212	0.454777
MIA	-1.05786	0.00658443	-0.00622429	0.212	0.454777
NUDT16	-1.06342	-0.0220187	0.0207054	0.212	0.454777
OPTC	-1.05776	0.0177856	-0.0168144	0.212	0.454777
STX7	-1.05958	-0.0125322	0.0118276	0.212	0.454777
TRIM21	-1.06202	0.0157945	-0.0148722	0.212	0.454777
VTI1A	-1.06135	-0.0191484	0.0180416	0.212	0.454777
AGER	-1.05584	0.0175358	-0.0166084	0.216	0.460642
EDAR	-1.06285	0.00233456	-0.00219652	0.216	0.460642
FRMD4B	-1.06409	0.00367066	-0.00344958	0.216	0.460642
GLP1R	-1.06199	0.00478964	-0.00451006	0.216	0.460642
HSD17B3	-1.06417	-0.00637224	0.00598798	0.216	0.460642
MAP2K6	-1.06269	0.0103225	-0.00971355	0.216	0.460642
PRL	-1.06152	0.00245205	-0.00230995	0.216	0.460642
PRUNE2	-1.06027	-0.0189625	0.0178847	0.216	0.460642
ACRV1	-1.05888	-0.00211964	0.00200177	0.22	0.46746
ASPN	-1.05884	-0.00528891	0.004995	0.22	0.46746
KLK14	-1.05638	0.00346858	-0.00328346	0.22	0.46746
PPM1B	-1.06641	0.00203976	-0.00191273	0.22	0.46746
SEPTIN9	-1.06131	-0.0131317	0.0123731	0.22	0.46746
CBLN1	-1.05858	0.00173394	-0.00163799	0.224	0.47354
CDKN2D	-1.06208	0.0117118	-0.0110273	0.224	0.47354
CENPJ	-1.0595	-0.00323235	0.00305083	0.224	0.47354
EIF2S2	-1.06069	0.00894546	-0.00843366	0.224	0.47354
F11R	-1.06428	-0.0275442	0.0258807	0.224	0.47354
MEP1B	-1.06017	0.0158352	-0.0149364	0.224	0.47354
UNC5D	-1.05607	0.00998974	-0.00945933	0.224	0.47354
CEBPA	-1.06011	-0.0100402	0.00947097	0.228	0.480252
DCTD	-1.06169	0.0130229	-0.0122662	0.228	0.480252
IL11	-1.0597	0.00397002	-0.00374636	0.228	0.480252
MKI67	-1.05944	-0.00509467	0.00480882	0.228	0.480252
SERPINF2	-1.05418	0.0203266	-0.0192819	0.228	0.480252
APOL1	-1.0537	0.0212158	-0.0201346	0.232	0.484818
CAMLG	-1.06251	0.00629728	-0.00592678	0.232	0.484818
CLEC4C	-1.06265	-0.00744281	0.00700403	0.232	0.484818
CNTN4	-1.05599	0.00213775	-0.00202439	0.232	0.484818
COPB2	-1.06384	-0.00566826	0.00532812	0.232	0.484818
DOC2B	-1.05967	-0.00268788	0.00253654	0.232	0.484818
GNGT1	-1.06341	-0.00269042	0.00252998	0.232	0.484818
GUCY2C	-1.06466	-0.00226929	0.00213147	0.232	0.484818
PDGFC	-1.06171	-0.0223902	0.0210887	0.232	0.484818
PSCA	-1.0656	0.0029079	-0.00272889	0.232	0.484818
RAB33A	-1.06281	0.010651	-0.0100215	0.232	0.484818
C4BPB	-1.06843	-0.0065377	0.00611897	0.236	0.491413
FGFBP2	-1.0622	0.01108	-0.0104312	0.236	0.491413
IL4	-1.06412	0.00185652	-0.00174466	0.236	0.491413
PHLDB2	-1.06267	-0.00241841	0.0022758	0.236	0.491413
TMCO5A	-1.05952	0.00880104	-0.00830664	0.236	0.491413
ASRGL1	-1.06211	0.00984049	-0.009265	0.24	0.497607
EIF4B	-1.06057	0.0171527	-0.0161731	0.24	0.497607
ENTPD6	-1.06101	-0.0124606	0.011744	0.24	0.497607
ITGA6	-1.05768	0.00791296	-0.00748145	0.24	0.497607
RANBP2	-1.06153	0.00418668	-0.00394398	0.24	0.497607
TBL1X	-1.06171	0.0103492	-0.00974766	0.24	0.497607
MYBPC2	-1.06153	-0.0100418	0.00945976	0.244	0.504463
PFDN2	-1.06228	0.00268077	-0.0025236	0.244	0.504463
PPM1A	-1.06088	0.00378823	-0.00357083	0.244	0.504463
PPP1R9B	-1.0621	-0.0140143	0.013195	0.244	0.504463
LRCH4	-1.06058	-0.0237976	0.0224382	0.248	0.512369
ARHGAP5	-1.06064	0.00475091	-0.00447929	0.252	0.5166
CALCOCO2	-1.06068	-0.0143246	0.0135052	0.252	0.5166
CCL24	-1.05997	-0.00816765	0.00770551	0.252	0.5166
CEP152	-1.05966	-0.00336289	0.00317354	0.252	0.5166
IL17F	-1.05823	-0.00291095	0.00275077	0.252	0.5166
IL1RL2	-1.06444	0.00744712	-0.00699631	0.252	0.5166
MLLT1	-1.06008	-0.00171473	0.00161754	0.252	0.5166
PNLIPRP2	-1.06318	0.00219632	-0.0020658	0.252	0.5166
SELP	-1.06389	-0.0245829	0.0231067	0.252	0.5166
SRPX	-1.02266	0.00427425	-0.00417953	0.252	0.5166
SSNA1	-1.06388	-0.0200928	0.0188863	0.252	0.5166
ATF2	-1.06452	-0.00447517	0.00420395	0.256	0.523694
PDCD5	-1.06421	-0.0241385	0.0226821	0.256	0.523694
SNX9	-1.06097	-0.0126107	0.011886	0.256	0.523694
AKR1C4	-1.06016	-0.0174605	0.0164698	0.26	0.530014
CHRM1	-1.0633	0.00558575	-0.0052532	0.26	0.530014
FHIT	-1.06134	0.0148187	-0.0139623	0.26	0.530014
LRRFIP1	-1.05985	-0.0135376	0.0127731	0.26	0.530014
RGCC	-1.0627	0.0166067	-0.0156269	0.26	0.530014
ANKMY2	-1.0636	0.00953122	-0.00896127	0.264	0.536665
NLGN2	-1.06114	0.00162654	-0.00153283	0.264	0.536665
SBSN	-1.0667	-0.00365257	0.00342417	0.264	0.536665
SSBP1	-1.05919	-0.00188632	0.00178091	0.264	0.536665
CD101	-1.06107	-0.0140057	0.0131996	0.268	0.5429
CXCL6	-1.06361	-0.0233952	0.0219961	0.268	0.5429
DAPP1	-1.06163	0.00697802	-0.00657292	0.268	0.5429
GZMH	-1.05803	-0.0129818	0.0122698	0.268	0.5429
PVALB	-1.06052	0.00319868	-0.00301614	0.268	0.5429
CCND2	-1.06207	-0.00330941	0.00311599	0.272	0.549474
MED21	-1.06192	-0.00191668	0.00180492	0.272	0.549474
NAGK	-1.06183	0.0280492	-0.0264159	0.272	0.549474
TPSD1	-1.06278	-0.00266858	0.00251094	0.272	0.549474
CHL1	-1.06259	0.011327	-0.0106597	0.276	0.556011
MAN2B2	-1.06077	-0.025078	0.0236414	0.276	0.556011
SH3BP1	-1.06303	-0.0129604	0.0121919	0.276	0.556011
TAX1BP1	-1.05874	-0.0171237	0.0161736	0.276	0.556011
APEX1	-1.06156	-0.0226133	0.021302	0.28	0.560578
ATP5F1D	-1.05987	-0.00163597	0.00154356	0.28	0.560578
CPB2	-1.05432	0.0213599	-0.0202593	0.28	0.560578
KITLG	-1.06051	-0.033538	0.0316243	0.28	0.560578
KYAT1	-1.06218	0.0257405	-0.0242335	0.28	0.560578
SMARCA2	-1.06235	0.00860061	-0.00809585	0.28	0.560578
STX1B	-1.06262	0.00179225	-0.00168664	0.28	0.560578
STX5	-1.063	0.00558419	-0.00525324	0.28	0.560578
TSNAX	-1.06114	0.00868451	-0.0081841	0.28	0.560578
IKBKG	-1.06465	0.0111487	-0.0104718	0.284	0.567415
LAP3	-1.06262	-0.0199793	0.018802	0.284	0.567415
UNG	-1.05949	0.0054277	-0.00512294	0.284	0.567415
ATP6V1G2	-1.064	-0.00496604	0.00466732	0.288	0.572265
C2	-1.06597	-0.0318769	0.0299041	0.288	0.572265
CDK1	-1.05997	-0.00783609	0.00739278	0.288	0.572265
DGCR6	-1.06165	-0.0100074	0.00942628	0.288	0.572265
ERBB4	-1.06746	-0.00434615	0.0040715	0.288	0.572265
NFU1	-1.06333	-0.015009	0.0141151	0.288	0.572265
SERPINE1	-1.06261	-0.0285646	0.0268815	0.288	0.572265
ZFYVE19	-1.06108	0.01482	-0.0139669	0.288	0.572265
AHSP	-1.06172	-0.00705551	0.00664534	0.292	0.577454
CGN	-1.06344	-0.00449909	0.00423069	0.292	0.577454
CPA1	-1.06325	-0.0148905	0.0140047	0.292	0.577454
LCAT	-1.05252	0.0403964	-0.0383807	0.292	0.577454
MICALL2	-1.05995	-0.00637145	0.0060111	0.292	0.577454
PCYT2	-1.06294	-0.020493	0.0192796	0.292	0.577454
TBR1	-1.06184	0.00162062	-0.00152624	0.292	0.577454
GMPR	-1.061	0.00744779	-0.00701957	0.296	0.583383
GSTA1	-1.06379	-0.0709346	0.0666807	0.296	0.583383
NTRK2	-1.06254	-0.0149235	0.0140452	0.296	0.583383
TNXB	-1.06405	0.00201808	-0.00189661	0.296	0.583383
UPB1	-1.06296	-0.0636861	0.059914	0.296	0.583383
AHSA1	-1.06322	-0.00488641	0.00459585	0.3	0.590068
CCL27	-1.06517	-0.0208968	0.0196184	0.3	0.590068
VSNL1	-1.05927	-0.0435606	0.0411232	0.3	0.590068
AMY2A	-1.06199	0.0195514	-0.0184102	0.304	0.595922
AP3B1	-1.0631	-0.0154866	0.0145674	0.304	0.595922
CPLX2	-1.06085	0.002137	-0.00201442	0.304	0.595922
RGL2	-1.06393	0.00255163	-0.00239831	0.304	0.595922
VGF	-1.06091	0.0124297	-0.0117161	0.304	0.595922
ACP1	-1.06301	0.00194403	-0.0018288	0.308	0.599324
AIF1	-1.06412	-0.0134994	0.0126859	0.308	0.599324
ARL2BP	-1.06083	0.00888877	-0.00837907	0.308	0.599324
CA2	-1.06178	-0.0108229	0.0101931	0.308	0.599324
CASP2	-1.06298	0.0122086	-0.0114853	0.308	0.599324
CHM	-1.06081	0.00973897	-0.00918069	0.308	0.599324
CLEC11A	-1.0625	-0.0133626	0.0125766	0.308	0.599324
FRZB	-1.05997	-0.0132701	0.0125193	0.308	0.599324
PROK1	-1.0566	-0.00299989	0.00283919	0.308	0.599324
PRTFDC1	-1.06208	0.00884245	-0.00832559	0.308	0.599324
SIGLEC15	-1.06408	-0.0022833	0.0021458	0.308	0.599324
ACADM	-1.05901	-0.0060007	0.0056663	0.312	0.603476
CDHR2	-1.06681	-0.0729877	0.0684165	0.312	0.603476
CNTN3	-1.06555	-0.0369472	0.0346741	0.312	0.603476
HMOX2	-1.06412	-0.0303206	0.0284937	0.312	0.603476
LRP2BP	-1.06169	-0.00185073	0.00174319	0.312	0.603476
NFIC	-1.06361	-0.00517975	0.00486997	0.312	0.603476
RECK	-1.05601	-0.00323732	0.00306563	0.312	0.603476
UHRF2	-1.06267	0.00121968	-0.00114775	0.312	0.603476
WARS	-1.06265	-0.0322463	0.0303453	0.312	0.603476
ATXN2	-1.06459	0.00496612	-0.00466484	0.316	0.606778
CACNA1H	-1.05978	0.00381845	-0.00360305	0.316	0.606778
DGKZ	-1.06302	0.0063465	-0.00597024	0.316	0.606778
FLT3	-1.06575	-0.00542616	0.0050914	0.316	0.606778
HHEX	-1.06471	-0.035113	0.032979	0.316	0.606778
LTO1	-1.06132	0.00133666	-0.00125943	0.316	0.606778
MYOC	-1.05919	-0.00282684	0.00266887	0.316	0.606778
PEBP1	-1.06234	-0.0174628	0.016438	0.316	0.606778
SEZ6L	-1.05718	0.0133193	-0.0125988	0.316	0.606778
SH2B3	-1.06265	0.0102207	-0.00961813	0.316	0.606778
SMPDL3A	-1.06453	0.00227708	-0.00213904	0.316	0.606778
BTLA	-1.06373	0.00195603	-0.00183884	0.32	0.612037
CRTAP	-1.06004	0.00324203	-0.00305839	0.32	0.612037
IMPG1	-1.06281	-0.00135549	0.00127538	0.32	0.612037
MSTN	-1.06386	0.00582191	-0.00547245	0.32	0.612037
SEMA6C	-1.05639	-0.00148249	0.00140336	0.32	0.612037
WASHC3	-1.06144	-0.0132706	0.0125025	0.32	0.612037
CA12	-1.05381	-0.00748292	0.00710084	0.324	0.61685
CBS	-1.05937	-0.0476581	0.0449874	0.324	0.61685
GNE	-1.06142	0.0130017	-0.0122494	0.324	0.61685
NID1	-1.062	-0.0221165	0.0208252	0.324	0.61685
PRKAR1A	-1.06264	-0.0120765	0.0113646	0.324	0.61685
VWC2L	-1.06176	-0.011232	0.0105787	0.324	0.61685
XRCC4	-1.0629	-0.0129766	0.0122087	0.324	0.61685
AMPD3	-1.06183	-0.00402658	0.0037921	0.328	0.622025
CDC27	-1.06286	-0.0121209	0.0114041	0.328	0.622025
DENND2B	-1.06351	-0.00150665	0.00141668	0.328	0.622025
NRGN	-1.06179	0.0113355	-0.0106758	0.328	0.622025
PSMG4	-1.06056	-0.00585903	0.00552446	0.328	0.622025
TRIM24	-1.06208	0.0167756	-0.0157951	0.328	0.622025
IL1R1	-1.03436	-0.00640933	0.00619645	0.332	0.628791
LZTFL1	-1.06064	0.0157244	-0.0148253	0.332	0.628791
APP	-1.06053	0.0156566	-0.014763	0.336	0.631845
CDON	-1.06138	0.0154134	-0.0145221	0.336	0.631845
CPE	-1.06587	-0.00824687	0.0077372	0.336	0.631845
DARS1	-1.06078	0.00518739	-0.00489019	0.336	0.631845
DTX2	-1.06329	-0.00183051	0.00172155	0.336	0.631845
ECI2	-1.06182	-0.0129278	0.0121751	0.336	0.631845
FCN2	-1.05406	0.019902	-0.0188813	0.336	0.631845
FST	-1.0699	-0.0274375	0.0256449	0.336	0.631845
MUC2	-1.05901	0.00317372	-0.00299687	0.336	0.631845
RAB37	-1.06231	0.00361417	-0.00340218	0.336	0.631845
TXNRD1	-1.0616	-0.0231769	0.0218321	0.336	0.631845
ARAF	-1.0616	-0.00699715	0.00659113	0.34	0.636489
FMNL1	-1.06193	-0.0158781	0.0149521	0.34	0.636489
GALNT5	-1.05973	0.00180349	-0.00170184	0.34	0.636489
NCLN	-1.06507	-0.0014907	0.00139963	0.34	0.636489
NIT1	-1.06348	0.0138019	-0.012978	0.34	0.636489
SRPK2	-1.06245	-0.0159626	0.0150243	0.34	0.636489
TANK	-1.06075	0.0116152	-0.01095	0.34	0.636489
ANKRA2	-1.06466	0.00144448	-0.00135676	0.344	0.640271
APRT	-1.06235	-0.00516427	0.0048612	0.344	0.640271
CLSTN1	-1.06074	-0.00319143	0.00300868	0.344	0.640271
MASP1	-1.05815	-0.0225795	0.0213386	0.344	0.640271
MYH7B	-1.06084	0.00127042	-0.00119756	0.344	0.640271
NID2	-1.06411	-0.014498	0.0136245	0.344	0.640271
NUDT10	-1.06169	-0.00274023	0.00258099	0.344	0.640271
TP53BP1	-1.06155	-0.00226514	0.00213381	0.344	0.640271
TPPP3	-1.06202	-0.0048458	0.00456281	0.344	0.640271
BCL2L1	-1.06023	0.0106026	-0.0100003	0.348	0.64442
EPHX2	-1.06204	0.0169519	-0.0159617	0.348	0.64442
LAMP1	-1.06339	-0.0137744	0.0129533	0.348	0.64442
PSMC3	-1.06407	-0.00333032	0.00312979	0.348	0.64442
SPARC	-1.06112	0.0141724	-0.0133561	0.348	0.64442
SV2A	-1.06355	-0.0076758	0.00721713	0.348	0.64442
TMPRSS11B	-1.06257	-0.00135207	0.00127246	0.348	0.64442
VIPR1	-1.06108	-0.00452063	0.00426039	0.348	0.64442
BCAT2	-1.06291	-0.00266823	0.00251032	0.352	0.648527
DCTN6	-1.06277	0.00932608	-0.00877526	0.352	0.648527
DEFB104A_DEFB104B	-1.06038	-0.00135925	0.00128185	0.352	0.648527
DYNLT1	-1.06355	-0.0144002	0.0135399	0.352	0.648527
PNPT1	-1.06406	0.00135352	-0.00127204	0.352	0.648527
PROS1	-1.05184	0.0264806	-0.0251756	0.352	0.648527
RPGR	-1.05803	0.00148437	-0.00140296	0.352	0.648527
TCL1B	-1.06279	0.00140108	-0.00131831	0.352	0.648527
CDA	-1.06449	-0.0238624	0.0224168	0.356	0.652181
CDH5	-1.05666	0.0016764	-0.0015865	0.356	0.652181
DPEP2	-1.05849	-0.00396924	0.0037499	0.356	0.652181
FN1	-1.05842	0.0262016	-0.0247554	0.356	0.652181
FZD8	-1.05777	-0.00151097	0.00142845	0.356	0.652181
HDGF	-1.06099	-0.00922505	0.00869476	0.356	0.652181
HIF1A	-1.06005	-0.00268772	0.00253548	0.356	0.652181
MAP2K1	-1.06273	-0.012929	0.0121658	0.356	0.652181
S100A16	-1.06126	0.00183499	-0.00172906	0.356	0.652181
CA7	-1.06146	-0.00518341	0.0048833	0.36	0.654157
CYB5R2	-1.06286	-0.0141315	0.0132957	0.36	0.654157
DKK1	-1.06096	0.0197784	-0.018642	0.36	0.654157
DNM1	-1.06135	0.00625511	-0.00589354	0.36	0.654157
EP300	-1.06095	-0.00244072	0.00230051	0.36	0.654157
FUS	-1.06278	-0.0189429	0.0178239	0.36	0.654157
ITM2A	-1.06077	0.00188033	-0.00177262	0.36	0.654157
NAGA	-1.06328	0.00603144	-0.00567248	0.36	0.654157
NFYA	-1.06004	-0.00913093	0.00861379	0.36	0.654157
PHYKPL	-1.06198	0.029078	-0.0273811	0.36	0.654157
PMVK	-1.06259	0.00863833	-0.00812947	0.36	0.654157
PZP	-1.06689	-0.0115582	0.0108335	0.36	0.654157
SEZ6	-1.06004	0.00953312	-0.00899314	0.36	0.654157
CDK5RAP3	-1.06064	0.0075845	-0.0071509	0.364	0.660189
NT5C	-1.06173	0.00922195	-0.0086858	0.364	0.660189
SCN3A	-1.06307	-0.00124124	0.00116761	0.364	0.660189
AMY2B	-1.06266	0.0163286	-0.0153658	0.368	0.664134
IL21R	-1.0618	0.00114044	-0.00107406	0.368	0.664134
ITIH1	-1.06507	-0.001402	0.00131634	0.368	0.664134
LDLR	-1.0514	0.0485977	-0.0462218	0.368	0.664134
MANSC4	-1.0602	-0.00157541	0.00148596	0.368	0.664134
MEPE	-1.06626	-0.00479416	0.00449625	0.368	0.664134
RIPK4	-1.06098	-0.00184412	0.00173812	0.368	0.664134
SLIRP	-1.06155	-0.00465174	0.00438201	0.368	0.664134
BANK1	-1.06372	0.0124087	-0.0116654	0.372	0.668452
CEBPB	-1.05872	-0.0136574	0.0128999	0.372	0.668452
COL4A4	-1.06373	-0.00131277	0.00123412	0.372	0.668452
FGF7	-1.0624	-0.000981226	0.000923591	0.372	0.668452
GLT8D2	-1.06099	0.00226292	-0.00213283	0.372	0.668452
MPIG6B	-1.0625	0.00965372	-0.00908583	0.372	0.668452
WAS	-1.06245	0.00608462	-0.00572698	0.372	0.668452
ATOX1	-1.06376	-0.011596	0.010901	0.376	0.672733
CES1	-1.06048	-0.0549998	0.0518633	0.376	0.672733
CNTF	-1.06178	0.00204558	-0.00192656	0.376	0.672733
DIABLO	-1.06078	0.0101675	-0.00958497	0.376	0.672733
NMRK2	-1.06078	-0.00282301	0.00266126	0.376	0.672733
SUGT1	-1.06078	0.00912119	-0.00859855	0.376	0.672733
THRAP3	-1.06016	-0.00178601	0.00168465	0.376	0.672733
AAMDC	-1.06298	0.0135178	-0.0127169	0.38	0.676977
B4GAT1	-1.06251	-0.00126994	0.00119523	0.38	0.676977
CACNA1C	-1.06371	0.00119553	-0.00112393	0.38	0.676977
CRYBB1	-1.06295	-0.0129112	0.0121465	0.38	0.676977
GLB1	-1.06268	-0.0209682	0.0197314	0.38	0.676977
GMFG	-1.06123	0.00973868	-0.00917682	0.38	0.676977
RRAS	-1.06044	0.0112751	-0.0106325	0.38	0.676977
CDH4	-1.06145	-0.0012878	0.00121325	0.384	0.682016
FOSB	-1.06002	-0.00424698	0.00400649	0.384	0.682016
LGALS8	-1.06451	-0.0152882	0.0143617	0.384	0.682016
MYDGF	-1.06226	-0.0165316	0.0155626	0.384	0.682016
PDZD2	-1.06212	-0.00759566	0.00715143	0.384	0.682016
PDCD6	-1.06294	-0.00424962	0.00399799	0.388	0.687861
SPACA5_SPACA5B	-1.0533	0.00130822	-0.00124202	0.388	0.687861
TP53	-1.06251	-0.0120113	0.0113046	0.388	0.687861
CNTN1	-1.06634	-0.0116855	0.0109585	0.392	0.689911
ERI1	-1.06161	-0.00886621	0.00835164	0.392	0.689911
FLI1	-1.06023	0.0171892	-0.0162128	0.392	0.689911
KLK3	-1.06133	0.00130153	-0.00122631	0.392	0.689911
MED18	-1.06111	0.00978253	-0.00921913	0.392	0.689911
PLXNB3	-1.06082	0.012497	-0.0117805	0.392	0.689911
PODXL	-1.05842	-0.00132334	0.00125029	0.392	0.689911
PSMD1	-1.06047	-0.00317946	0.00299817	0.392	0.689911
PTPN6	-1.06222	0.0047035	-0.00442797	0.392	0.689911
RRM2B	-1.05956	0.0138938	-0.0131128	0.392	0.689911
SNX15	-1.06131	-0.0140102	0.0132009	0.392	0.689911
SPAG1	-1.06347	-0.00709104	0.00666783	0.392	0.689911
BCHE	-1.06762	-0.0290016	0.0271648	0.396	0.692346
COX6B1	-1.06346	-0.00901764	0.00847955	0.396	0.692346
GAL	-1.06751	-0.0137916	0.0129194	0.396	0.692346
HSP90B1	-1.06229	0.0012307	-0.00115854	0.396	0.692346
NMT1	-1.06157	0.00608921	-0.00573602	0.396	0.692346
PARP1	-1.05931	-0.0176333	0.016646	0.396	0.692346
RALB	-1.06068	-0.00188033	0.00177276	0.396	0.692346
RBM17	-1.06038	0.0105259	-0.00992649	0.396	0.692346
THTPA	-1.06073	0.0100316	-0.00945721	0.396	0.692346
TOP2B	-1.06227	-0.0181548	0.0170905	0.396	0.692346
TPRKB	-1.06051	0.00141063	-0.00133015	0.396	0.692346
ITGB2	-1.06079	-0.0163378	0.0154016	0.4	0.697663
SRC	-1.06204	0.00585937	-0.00551711	0.4	0.697663
TTN	-1.06116	-0.00386927	0.00364625	0.4	0.697663
ZP3	-1.05824	0.00125756	-0.00118835	0.4	0.697663
ARG2	-1.0627	-0.00199427	0.00187661	0.404	0.701278
BACH1	-1.06279	0.0120795	-0.0113658	0.404	0.701278
EIF5A	-1.06078	0.00140688	-0.00132627	0.404	0.701278
IDS	-1.06354	-0.00198277	0.00186432	0.404	0.701278
MAPRE3	-1.06179	0.000972896	-0.000916278	0.404	0.701278
SDK2	-1.06048	-0.00657381	0.00619888	0.404	0.701278
TARS1	-1.06147	0.00358468	-0.00337709	0.404	0.701278
VCPKMT	-1.06326	0.00185118	-0.00174104	0.404	0.701278
APPL2	-1.06324	0.00814505	-0.00766056	0.408	0.706117
ARHGAP25	-1.06223	0.0105815	-0.0099616	0.408	0.706117
DLG4	-1.06144	0.00824669	-0.00776933	0.408	0.706117
DSCAM	-1.06355	-0.0159712	0.0150168	0.408	0.706117
LAMTOR5	-1.06272	-0.00336994	0.00317106	0.408	0.706117
BATF	-1.06016	-0.00177067	0.00167019	0.412	0.71177
LHPP	-1.06084	-0.0127294	0.0119993	0.412	0.71177
TRIM5	-1.06204	0.00724421	-0.00682105	0.412	0.71177
ATP6AP2	-1.06261	-0.00818171	0.00769967	0.416	0.71613
EGF	-1.06177	0.0109918	-0.0103523	0.416	0.71613
ELAC1	-1.06145	0.00992054	-0.00934622	0.416	0.71613
NGF	-1.05995	-0.00110719	0.00104457	0.416	0.71613
NUDT15	-1.06122	0.00194279	-0.00183071	0.416	0.71613
RYR1	-1.06072	0.000940889	-0.000887029	0.416	0.71613
CEACAM1	-1.06162	-0.0245897	0.0231624	0.42	0.719612
MINDY1	-1.06253	0.00627367	-0.00590448	0.42	0.719612
OTUD7B	-1.06251	-0.0139563	0.0131353	0.42	0.719612
PDE5A	-1.06255	0.00931077	-0.00876263	0.42	0.719612
PRND	-1.04195	0.00244131	-0.00234303	0.42	0.719612
RAC3	-1.06303	0.00150372	-0.00141455	0.42	0.719612
ZCCHC8	-1.06335	0.00198085	-0.00186283	0.42	0.719612
ZNF830	-1.06275	-0.00116021	0.00109171	0.42	0.719612
CDKN1A	-1.06367	-0.0156328	0.0146971	0.424	0.723909
EREG	-1.05902	0.0151405	-0.0142966	0.424	0.723909
GRIN2B	-1.06195	-0.000951646	0.000896127	0.424	0.723909
LRP2	-1.06109	-0.00119665	0.00112776	0.424	0.723909
TRDMT1	-1.06076	0.00574025	-0.00541147	0.424	0.723909
TSPAN1	-1.059	-0.00152643	0.00144139	0.424	0.723909
CCS	-1.06122	0.00450024	-0.00424062	0.428	0.728175
HS1BP3	-1.06191	0.0122944	-0.0115776	0.428	0.728175
KLK7	-1.06332	0.00185947	-0.00174874	0.428	0.728175
MPHOSPH8	-1.06021	0.0120943	-0.0114075	0.428	0.728175
NAGPA	-1.06402	-0.0254995	0.0239652	0.428	0.728175
VEGFC	-1.06107	0.0158534	-0.014941	0.428	0.728175
ALDH2	-1.06431	0.0115056	-0.0108104	0.432	0.729862
ALDH5A1	-1.06172	-0.0198346	0.0186817	0.432	0.729862
BHMT2	-1.06232	0.000999909	-0.000941249	0.432	0.729862
BOLA2_BOLA2B	-1.06166	-0.00884612	0.00833235	0.432	0.729862
BRSK2	-1.06283	-0.00431296	0.00405801	0.432	0.729862
DPP10	-1.05659	-0.00549221	0.00519803	0.432	0.729862
IL22RA1	-1.06157	-0.00453139	0.00426857	0.432	0.729862
IZUMO1	-1.05952	-0.000905505	0.000854635	0.432	0.729862
MAPKAPK2	-1.06173	0.00622433	-0.00586245	0.432	0.729862
PCDHB15	-1.04719	0.00180981	-0.00172826	0.432	0.729862
PKLR	-1.05941	-0.00430434	0.00406296	0.432	0.729862
SIRT5	-1.06181	0.00307602	-0.00289695	0.432	0.729862
CCDC134	-1.06385	-0.00976995	0.00918361	0.436	0.731525
CEP85	-1.06344	0.0117907	-0.0110873	0.436	0.731525
CLUL1	-1.05999	0.0137861	-0.0130058	0.436	0.731525
COL1A1	-1.06482	-0.00531568	0.0049921	0.436	0.731525
EVPL	-1.06241	0.00107293	-0.00100991	0.436	0.731525
F2	-1.05857	0.00696596	-0.00658053	0.436	0.731525
GRHPR	-1.06214	0.023701	-0.0223144	0.436	0.731525
JPT2	-1.06151	0.00932709	-0.00878661	0.436	0.731525
MPI	-1.06322	-0.00986074	0.00927444	0.436	0.731525
PAFAH2	-1.0604	0.00851787	-0.00803266	0.436	0.731525
PRKAR2A	-1.0619	-0.0135723	0.0127812	0.436	0.731525
SSB	-1.06215	0.00240733	-0.00226646	0.436	0.731525
ANGPTL3	-1.06181	-0.00631418	0.00594664	0.44	0.734006
BLOC1S3	-1.06076	0.0112152	-0.0105728	0.44	0.734006
EIF5	-1.06079	0.00277109	-0.00261229	0.44	0.734006
FGF6	-1.06204	0.00129982	-0.00122389	0.44	0.734006
GOPC	-1.0622	0.00938307	-0.00883365	0.44	0.734006
IL10RA	-1.0622	-0.00462398	0.0043532	0.44	0.734006
NAA80	-1.05999	0.0137352	-0.0129579	0.44	0.734006
PNMA1	-1.06073	0.00840533	-0.00792407	0.44	0.734006
RAD23B	-1.06202	0.0055313	-0.0052083	0.44	0.734006
VAMP5	-1.06257	-0.0204478	0.0192436	0.44	0.734006
ADCYAP1R1	-1.06251	0.000942327	-0.000886891	0.444	0.737719
CUZD1	-1.06652	0.00120035	-0.00112548	0.444	0.737719
DNLZ	-1.06206	0.00151926	-0.00143048	0.444	0.737719
LYN	-1.06322	-0.010549	0.00992172	0.444	0.737719
PALLD	-1.06039	-0.00105486	0.000994782	0.444	0.737719
PDIA5	-1.06307	-0.00586616	0.00551814	0.444	0.737719
STAT5B	-1.06161	0.0102345	-0.00964055	0.444	0.737719
BRDT	-1.06266	0.0053167	-0.0050032	0.448	0.740982
CLINT1	-1.06174	-0.000797212	0.000750857	0.448	0.740982
DYNLT3	-1.05998	0.00548561	-0.0051752	0.448	0.740982
FABP2	-1.06106	-0.00256718	0.00241944	0.448	0.740982
GADD45B	-1.06	-0.000972699	0.000917639	0.448	0.740982
PGR	-1.06606	-0.00093929	0.000881084	0.448	0.740982
PLPBP	-1.06205	0.0105064	-0.00989252	0.448	0.740982
UROD	-1.06271	0.00978826	-0.00921065	0.448	0.740982
ARID4B	-1.06374	0.00436503	-0.00410347	0.452	0.74548
GADD45GIP1	-1.06277	-0.010845	0.0102044	0.452	0.74548
GRK5	-1.05956	0.00554501	-0.00523332	0.452	0.74548
PPP1CC	-1.06158	0.0086482	-0.00814656	0.452	0.74548
STIP1	-1.06285	-0.00983281	0.00925138	0.452	0.74548
AFM	-1.05949	0.0315051	-0.029736	0.456	0.749529
BIRC2	-1.06074	0.00740633	-0.00698224	0.456	0.749529
CMIP	-1.06072	0.0110526	-0.0104199	0.456	0.749529
GPI	-1.06262	-0.0172523	0.0162356	0.456	0.749529
HMGCS1	-1.06204	0.000975736	-0.000918735	0.456	0.749529
MYO9B	-1.0608	-0.00532837	0.00502298	0.456	0.749529
CLEC4M	-1.06116	-0.00103602	0.000976304	0.46	0.753551
DHODH	-1.06223	0.00184773	-0.00173947	0.46	0.753551
LIPF	-1.06116	-0.0010092	0.000951036	0.46	0.753551
MGLL	-1.06256	0.00820353	-0.00772052	0.46	0.753551
NUDC	-1.06204	-0.0112297	0.0105737	0.46	0.753551
TAB2	-1.06375	0.00322857	-0.0030351	0.46	0.753551
ARHGAP45	-1.06206	0.00917957	-0.00864317	0.464	0.757121
DNAJC9	-1.06207	-0.00861864	0.00811494	0.464	0.757121
METAP1D	-1.06206	-0.0107325	0.0101053	0.464	0.757121
NEDD9	-1.06081	-0.0044678	0.0042117	0.464	0.757121
NPTX2	-1.05923	0.0012546	-0.00118444	0.464	0.757121
PCNA	-1.05973	-0.00104273	0.00098396	0.464	0.757121
RPL14	-1.06019	-0.0133082	0.0125527	0.464	0.757121
ELOB	-1.06304	-0.00562892	0.00529513	0.468	0.76194
NRP1	-1.01313	-0.00476373	0.004702	0.468	0.76194
RBPMS2	-1.06137	-0.0105265	0.00991784	0.468	0.76194
SCGB2A2	-1.06136	-0.00232989	0.00219519	0.468	0.76194
CHEK2	-1.06127	0.00091787	-0.00086488	0.472	0.764603
DCBLD2	-1.07582	-0.00316556	0.00294247	0.472	0.764603
IL17RB	-1.05918	0.0166657	-0.0157344	0.472	0.764603
ITGB1	-1.06043	-0.00552733	0.00521235	0.472	0.764603
LMOD2	-1.06217	0.000928715	-0.00087436	0.472	0.764603
PIKFYVE	-1.06235	-0.00772461	0.00727125	0.472	0.764603
PTRHD1	-1.06187	0.00968163	-0.00911756	0.472	0.764603
TPSG1	-1.06086	0.0019745	-0.00186123	0.472	0.764603
VPS37A	-1.06177	0.0121049	-0.0114007	0.472	0.764603
BPIFB1	-1.05956	0.0103669	-0.00978414	0.476	0.76937
CXCL1	-1.06197	-0.00758934	0.00714646	0.476	0.76937
GART	-1.0618	-0.00146359	0.00137841	0.476	0.76937
UPK3BL1	-1.06194	0.00112653	-0.00106082	0.476	0.76937
CD164L2	-1.06018	-0.00111398	0.00105075	0.48	0.77326
CEP112	-1.06073	-0.00402173	0.00379147	0.48	0.77326
MYCBP2	-1.06128	-0.00739521	0.00696818	0.48	0.77326
OGT	-1.06257	0.00140341	-0.00132077	0.48	0.77326
OXCT1	-1.06456	-0.010344	0.00971671	0.48	0.77326
THPO	-1.05935	0.00822923	-0.00776816	0.48	0.77326
AP3S2	-1.0623	0.0112324	-0.0105736	0.484	0.776267
FKBP7	-1.06259	-0.00563068	0.00529903	0.484	0.776267
IL1RAP	-1.06416	-0.0136306	0.0128088	0.484	0.776267
KLB	-1.06214	0.0106183	-0.00999711	0.484	0.776267
L3HYPDH	-1.06321	-0.0134217	0.0126238	0.484	0.776267
MNDA	-1.05936	-0.00772906	0.00729596	0.484	0.776267
PADI2	-1.06224	-0.00495191	0.00466177	0.484	0.776267
RASA1	-1.0623	-0.00172402	0.00162291	0.484	0.776267
GIPC3	-1.06193	0.00595345	-0.00560626	0.488	0.780103
INSL3	-1.06104	0.000946841	-0.00089237	0.488	0.780103
SERPINB6	-1.0622	-0.00742616	0.00699127	0.488	0.780103
STAU1	-1.06161	-0.00384245	0.00361947	0.488	0.780103
SUSD4	-1.05198	-0.00161398	0.00153423	0.488	0.780103
TTF2	-1.06213	0.0061171	-0.00575926	0.488	0.780103
C7ORF50	-1.06253	-0.00824453	0.00775932	0.492	0.78263
CNDP1	-1.05729	0.00683802	-0.00646751	0.492	0.78263
CNST	-1.06124	0.00904108	-0.00851933	0.492	0.78263
FLT4	-1.06431	-0.0169623	0.0159374	0.492	0.78263
LTA	-1.05973	-0.0084378	0.00796223	0.492	0.78263
LTB	-1.06086	-0.00379032	0.00357289	0.492	0.78263
NFKBIE	-1.0623	0.0130648	-0.0122986	0.492	0.78263
UGDH	-1.06282	0.00133485	-0.00125596	0.492	0.78263
VIM	-1.06052	-0.00437638	0.00412663	0.492	0.78263
PDIA4	-1.06256	-0.0103609	0.00975085	0.496	0.787701
SNX5	-1.06124	0.00442684	-0.00417139	0.496	0.787701
TERF1	-1.06126	0.00306883	-0.00289167	0.496	0.787701
ADD1	-1.06334	0.00453827	-0.00426793	0.5	0.788462
BOC	-1.05834	0.00569278	-0.00537898	0.5	0.788462
CCT5	-1.06214	0.00556794	-0.00524218	0.5	0.788462
CD248	-1.0558	0.00123874	-0.00117326	0.5	0.788462
CREBZF	-1.06172	0.00443532	-0.00417748	0.5	0.788462
HGS	-1.06117	0.00904555	-0.00852412	0.5	0.788462
LCP1	-1.06303	-0.0139486	0.0131216	0.5	0.788462
MMP13	-1.05955	-0.00565818	0.00534016	0.5	0.788462
NIT2	-1.06194	-0.0173064	0.016297	0.5	0.788462
PLXNA4	-1.06215	0.0100044	-0.00941904	0.5	0.788462
PSMG3	-1.06137	-0.00780153	0.00735041	0.5	0.788462
SCP2	-1.06349	0.00568132	-0.00534214	0.5	0.788462
TET2	-1.06335	0.000668417	-0.000628596	0.5	0.788462
ADH1B	-1.06184	-0.0376481	0.0354556	0.504	0.790061
AKT2	-1.06118	0.00597676	-0.00563219	0.504	0.790061
ANXA1	-1.06194	-0.00607136	0.00571724	0.504	0.790061
C8B	-1.05981	0.00894347	-0.00843874	0.504	0.790061
CALCOCO1	-1.0633	0.00485656	-0.00456742	0.504	0.790061
CDKL5	-1.06056	0.00209876	-0.00197892	0.504	0.790061
CRADD	-1.06099	0.0076153	-0.00717751	0.504	0.790061
MSRA	-1.0614	0.0106761	-0.0100586	0.504	0.790061
MUC16	-1.06014	-0.00382735	0.00361022	0.504	0.790061
PTPRH	-1.06135	-0.00823606	0.00776002	0.504	0.790061
TSC22D1	-1.06128	0.00622704	-0.00586746	0.504	0.790061
CASP7	-1.06157	0.00831424	-0.007832	0.508	0.793767
DIPK2B	-1.05757	-0.00235636	0.00222808	0.508	0.793767
EHD3	-1.06222	0.00617553	-0.00581379	0.508	0.793767
PAIP2B	-1.06078	-0.00113412	0.00106913	0.508	0.793767
PTPN9	-1.06139	-0.0012789	0.00120493	0.508	0.793767
TXN	-1.06223	-0.00628423	0.00591605	0.508	0.793767
CLIC5	-1.06242	0.000748997	-0.000704989	0.512	0.795746
LAMA1	-1.05914	0.00135037	-0.00127497	0.512	0.795746
MUCL3	-1.06293	-0.000855567	0.000804914	0.512	0.795746
SAG	-1.06138	0.00107824	-0.00101589	0.512	0.795746
SCLY	-1.05868	0.0523415	-0.0494403	0.512	0.795746
SNAP25	-1.06314	-0.00320641	0.00301599	0.512	0.795746
TNFAIP2	-1.06226	-0.0106824	0.0100563	0.512	0.795746
UBE2B	-1.06168	-0.00202135	0.00190391	0.512	0.795746
UBQLN3	-1.05971	-0.00140498	0.00132581	0.512	0.795746
YWHAQ	-1.0618	-0.00770851	0.00725988	0.512	0.795746
CEP164	-1.06275	0.00177714	-0.00167221	0.516	0.799402
MTSS1	-1.06206	0.00743528	-0.00700082	0.516	0.799402
PBK	-1.06043	0.00457549	-0.00431475	0.516	0.799402
PDLIM7	-1.06113	-0.0061752	0.00581945	0.516	0.799402
PPY	-1.06246	-0.00653139	0.00614744	0.516	0.799402
PRKAG3	-1.06072	0.00215659	-0.00203314	0.516	0.799402
AK1	-1.06286	-0.00681601	0.00641291	0.52	0.801334
CD69	-1.06142	0.00857846	-0.00808203	0.52	0.801334
CNTN2	-1.06392	0.000788835	-0.000741441	0.52	0.801334
CYTH3	-1.06285	0.00114923	-0.00108126	0.52	0.801334
DNAJA4	-1.06068	-0.00180915	0.00170565	0.52	0.801334
GALNT7	-1.06072	-0.00349581	0.00329569	0.52	0.801334
GASK1A	-1.05946	0.0130687	-0.0123352	0.52	0.801334
KHK	-1.06172	-0.0296155	0.027894	0.52	0.801334
MAP3K5	-1.06319	0.0044009	-0.00413932	0.52	0.801334
OMP	-1.06168	-0.000818279	0.00077074	0.52	0.801334
ACAN	-1.06237	-0.00709968	0.00668288	0.524	0.804517
CMC1	-1.06152	0.00972834	-0.00916454	0.524	0.804517
EDIL3	-1.05996	0.0014273	-0.00134656	0.524	0.804517
IL31RA	-1.06269	-0.00262196	0.00246729	0.524	0.804517
LRTM1	-1.06094	-0.0012564	0.00118423	0.524	0.804517
LYAR	-1.06225	-0.00376941	0.00354853	0.524	0.804517
STX6	-1.061	-0.00447756	0.00422011	0.524	0.804517
C2ORF69	-1.06362	-0.00436485	0.00410378	0.528	0.805982
GRP	-1.06183	0.00322219	-0.00303455	0.528	0.805982
HMMR	-1.06382	0.000939561	-0.0008832	0.528	0.805982
INPP1	-1.06222	-0.00669533	0.00630315	0.528	0.805982
MYOM1	-1.06016	-0.00273026	0.00257533	0.528	0.805982
PPIB	-1.06224	-0.00762639	0.00717955	0.528	0.805982
PPP1R12A	-1.06282	-0.0110256	0.0103739	0.528	0.805982
RAB6B	-1.06571	0.000785416	-0.000736986	0.528	0.805982
RALY	-1.05974	-0.00847969	0.00800167	0.528	0.805982
SARG	-1.06121	0.0101392	-0.00955442	0.528	0.805982
TSPAN7	-1.0621	-0.000711614	0.000670009	0.528	0.805982
ARG1	-1.06817	-0.000813727	0.000761792	0.532	0.809541
ATG16L1	-1.06274	-0.0099687	0.00938015	0.532	0.809541
CDAN1	-1.06341	-0.000940754	0.000884655	0.532	0.809541
FOXO3	-1.06207	0.00634711	-0.00597616	0.532	0.809541
PALM3	-1.06203	0.00287282	-0.00270503	0.532	0.809541
SIL1	-1.06127	-0.00672057	0.00633258	0.532	0.809541
ADH4	-1.05977	0.0547751	-0.0516856	0.536	0.813502
CC2D1A	-1.0619	-0.0107564	0.0101294	0.536	0.813502
RAPGEF2	-1.06094	0.00788645	-0.00743343	0.536	0.813502
TGM2	-1.06056	-0.00119563	0.00112736	0.536	0.813502
VASH1	-1.06013	0.00792437	-0.00747489	0.536	0.813502
ACRBP	-1.06305	-0.00504593	0.00474665	0.54	0.815322
CTNNA1	-1.06233	0.000967101	-0.00091036	0.54	0.815322
DDA1	-1.06142	-0.00223914	0.00210956	0.54	0.815322
DHRS4L2	-1.06243	-0.00536795	0.00505251	0.54	0.815322
FOXO1	-1.06235	0.00705634	-0.00664222	0.54	0.815322
GTF2IRD1	-1.06199	-0.000717692	0.000675797	0.54	0.815322
PFDN6	-1.06207	0.00074778	-0.000704076	0.54	0.815322
SOWAHA	-1.0603	0.00134078	-0.00126453	0.54	0.815322
UBAC1	-1.06112	-0.00318433	0.00300093	0.54	0.815322
VTCN1	-1.05651	-0.00111955	0.00105967	0.54	0.815322
APOE	-1.06324	0.00464259	-0.00436647	0.544	0.81839
C1GALT1C1	-1.06112	-0.00307903	0.00290169	0.544	0.81839
COL2A1	-1.06214	0.00508092	-0.00478367	0.544	0.81839
ICOSLG	-1.0651	-0.00494286	0.00464073	0.544	0.81839
NFKB1	-1.06179	0.010171	-0.00957912	0.544	0.81839
REST	-1.06213	0.00148226	-0.00139556	0.544	0.81839
TBC1D5	-1.06046	-0.004839	0.00456313	0.544	0.81839
CD177	-1.06249	-0.00121482	0.00114337	0.548	0.821013
GPHA2	-1.05968	0.00381897	-0.00360389	0.548	0.821013
GYS1	-1.06096	0.00642264	-0.00605359	0.548	0.821013
HMGCL	-1.06183	-0.00839503	0.00790622	0.548	0.821013
ING1	-1.06099	-0.00578785	0.00545514	0.548	0.821013
PPIF	-1.06094	0.00664621	-0.00626445	0.548	0.821013
PQBP1	-1.06312	0.00768181	-0.00722569	0.548	0.821013
SEPTIN7	-1.06235	0.00107701	-0.0010138	0.548	0.821013
FXYD5	-1.06101	0.00701483	-0.00661147	0.552	0.823615
KRT14	-1.06298	-0.000939627	0.000883958	0.552	0.823615
LRPAP1	-1.06149	0.00907626	-0.00855048	0.552	0.823615
LXN	-1.06355	-0.00131982	0.00124096	0.552	0.823615
PLAU	-1.05922	-0.00786036	0.00742091	0.552	0.823615
REG3G	-1.06045	-0.000785363	0.000740591	0.552	0.823615
RNF4	-1.06209	0.00076353	-0.000718891	0.552	0.823615
TMED10	-1.06191	0.000991229	-0.000933437	0.552	0.823615
BAG4	-1.06196	-0.0109328	0.0102949	0.556	0.826195
DAND5	-1.06105	0.000999351	-0.00094185	0.556	0.826195
ENO1	-1.06221	0.00433826	-0.0040842	0.556	0.826195
GRAP2	-1.06127	0.00695328	-0.00655182	0.556	0.826195
PTPN1	-1.06183	-0.00760419	0.00716142	0.556	0.826195
SNAP23	-1.06153	0.00818063	-0.00770643	0.556	0.826195
SOX2	-1.06098	0.000718067	-0.000676798	0.556	0.826195
TST	-1.06103	0.00832464	-0.00784583	0.556	0.826195
AK2	-1.06167	0.00748017	-0.00704567	0.56	0.827913
APCS	-1.05222	0.0357393	-0.0339657	0.56	0.827913
ATXN10	-1.06151	0.00398146	-0.00375075	0.56	0.827913
CRX	-1.06182	0.000794415	-0.000748167	0.56	0.827913
DDHD2	-1.06174	0.00722662	-0.00680636	0.56	0.827913
INPPL1	-1.06272	0.00762907	-0.00717884	0.56	0.827913
KIAA1549L	-1.06089	0.00243516	-0.00229538	0.56	0.827913
MTIF3	-1.0629	-0.00820935	0.00772355	0.56	0.827913
SCT	-1.06184	-0.00314915	0.00296576	0.56	0.827913
TJAP1	-1.06226	0.00786566	-0.00740462	0.56	0.827913
CAPN3	-1.06278	-0.00270931	0.00254926	0.564	0.829613
CASP9	-1.06088	0.00471957	-0.00444871	0.564	0.829613
CENPF	-1.06145	-0.00375421	0.00353687	0.564	0.829613
F11	-1.06622	-0.00528854	0.0049601	0.564	0.829613
FNTA	-1.06339	-0.0112105	0.0105422	0.564	0.829613
NFX1	-1.06317	0.00811813	-0.00763576	0.564	0.829613
NGFR	-1.06323	-0.000883429	0.000830888	0.564	0.829613
RGS10	-1.06093	0.00477672	-0.00450237	0.564	0.829613
RPA2	-1.06218	-0.00249806	0.00235181	0.564	0.829613
SH3GLB2	-1.06158	-0.0071052	0.00669303	0.564	0.829613
ART5	-1.06191	0.000641809	-0.00060439	0.568	0.831714
CXCL3	-1.0601	0.00899283	-0.00848297	0.568	0.831714
EIF4G3	-1.06268	0.0059599	-0.00560838	0.568	0.831714
FIS1	-1.06277	-0.0094443	0.0088865	0.568	0.831714
GBP4	-1.06226	-0.00404998	0.00381262	0.568	0.831714
GH2	-1.06105	0.000949324	-0.0008947	0.568	0.831714
IL1B	-1.06197	-0.00603584	0.00568361	0.568	0.831714
PADI4	-1.06168	-0.0028501	0.00268451	0.568	0.831714
SPINK8	-1.06154	0.00077985	-0.000734639	0.568	0.831714
CINP	-1.06207	-0.000664048	0.000625241	0.572	0.832962
CREG1	-1.06133	-0.0207456	0.0195469	0.572	0.832962
DNAJA2	-1.06201	-0.00789593	0.00743488	0.572	0.832962
ERBIN	-1.06156	0.00721393	-0.00679561	0.572	0.832962
KIAA2013	-1.0625	0.000925102	-0.000870686	0.572	0.832962
MGMT	-1.0624	0.00637499	-0.00600053	0.572	0.832962
MXRA8	-1.0635	-0.020893	0.0196455	0.572	0.832962
PLG	-1.06437	-0.0102682	0.00964729	0.572	0.832962
RNF41	-1.06161	0.0104646	-0.0098573	0.572	0.832962
RNF43	-1.06075	-0.00391576	0.00369148	0.572	0.832962
[truncated: 914 more rows]
