# Supplementary material
Source: Research Square preprint supplement (doi:10.21203/rs.3.rs-9437706/v1)
Supplement: Supplementary file 6 [file c2c881fba90696b18641077a.xlsx]

## Sheet: Sheet1
Supporting Table 3: The associations between allostatic load and the risk of CKD after excluding participants with CKD in 2 years.
Allostatic load	Events	Total/Person years	Model 1		Model 2		Model 3
			HR(95%CI)	P value	HR(95%CI)	P value	HR(95%CI)	P value
Per SD increment	15009	366662/4842137.4	1.81 (1.78-1.83)	<0.001	1.66 (1.64-1.69)	<0.001	1.27 (1.24-1.29)	<0.001
Q1	1390	91926/1230737.2	Ref		Ref		Ref
Q2	2449	91789/1219236.7	1.64 (1.53-1.75)	<0.001	1.51 (1.41-1.61)	<0.001	1.33 (1.24-1.42)	<0.001
Q3	4015	91605/1206865	2.75 (2.59-2.93)	<0.001	2.39 (2.25-2.54)	<0.001	1.55 (1.45-1.65)	<0.001
Q4	7155	91342/1185298.5	5.32 (5.02-5.63)	<0.001	4.15 (3.91-4.40)	<0.001	2.01 (1.88-2.14)	<0.001
Model 1: Adjusted for age, gender, ethnicity. Model 2: Adjused for model 1 plus TDI, education, BMI, smoking status, drinking status. Model 3: Adjused for model 2 plus eGFR, CVD , PRS. Abbrevation:BMI, body mass index; eGFR, estimated glomerular filtration rate; CVD:Cardiovascular disease; TDI:Townsend deprivation index; CKD:Chronic kidney disease; PRS:polygenic risk score; HR:Hazard Ratio; CI: c…
