# Supplementary material
Source: Research Square preprint supplement (doi:10.21203/rs.3.rs-9437706/v1)
Supplement: Supplementary file 9 [file f9dd0c5701d687282a71a7f5.xlsx]

## Sheet: Sheet1
Supporting Table 2: The associations between allostatic load and the risk of CKD after excluding participants without complete covariats.
Allostatic load	Events	Total/Person years	Model 1		Model 2		Model 3
			HR(95%CI)	P value	HR(95%CI)	P value	HR(95%CI)	P value
Per SD increment	15023	360897/4744159.9	1.81 (1.79-1.84)	<0.001	1.67 (1.64-1.69)	<0.001	1.27 (1.25-1.29)	<0.001
Q1	1383	90225/1205324.5	Ref		Ref		Ref
Q2	2429	90224/1194270.4	1.63 (1.53-1.74)	<0.001	1.51 (1.41-1.61)	<0.001	1.32 (1.23-1.41)	<0.001
Q3	4005	90224/1182606.1	2.75 (2.59-2.93)	<0.001	2.39 (2.25-2.54)	<0.001	1.55 (1.45-1.65)	<0.001
Q4	7206	90224/1161958.9	5.36 (5.06-5.68)	<0.001	4.18 (3.94-4.44)	<0.001	2.01 (1.89-2.15)	<0.001
Model 1: Adjusted for age, gender, ethnicity. Model 2: Adjused for model 1 plus TDI, education, BMI, smoking status, drinking status. Model 3: Adjused for model 2 plus eGFR, CVD , PRS. Abbrevation:BMI, body mass index; eGFR, estimated glomerular filtration rate; CVD:Cardiovascular disease; TDI:Townsend deprivation index; CKD:Chronic kidney disease; PRS:polygenic risk score; HR:Hazard Ratio; CI: c…
